# Supplementary material for: Phytochemical Investigation and Biofilm-Inhibitory Activity of Bachtiari Savory (Satureja bachtiarica Bunge) Aerial Parts
Source: MDPI journal article supplement (doi:10.3390/plants13010067), 2023-12-25
Supplement: s1 [file s1]

# Phytochemical investigation and biofilm-inhibitory activity of Bachtari savory (*Satureja bachtiarica* Bunge) aerial parts

Marzieh Rahmani Samani<sup>1,2</sup>, Gilda D'Urso<sup>1</sup>, Filomena Nazzaro<sup>3</sup>, Florinda Fratianni<sup>3</sup>, Milena Masullo<sup>1</sup>, Sonia Piacente<sup>1,\*</sup>

<sup>1</sup> Department of Pharmacy, University of Salerno, Via Giovanni II n. 132, 84084 Fisciano, Italy;

mrahmanisamani@unisa.it (M.R.S.); gidurso@unisa.it (G.D.); mmasullo@unisa.it (M.M.)

<sup>2</sup> PhD Program in Drug Discovery and Development, University of Salerno, via Giovanni Paolo II n. 132, 84084 Fisciano, Italy

<sup>3</sup> Institute of Food Science-National Research Council (CNR-ISA), Via Roma, 64, 83100 Avellino, Italy;

filomena.nazzaro@isa.cnr.it (F.N.); fratianni@isa.cnr.it (F.F.)

\* Correspondence: piacente@unisa.it; Tel.: +39-0899-69763

## *Total Flavonoid Content*

To quantify the total flavonoid content, the allumine chloride colorimetric assay was carried out and rutin was used as a reference. Following that, a 10-milliliter volumetric flask was filled with 1 mL of a sample with a concentration of 1 mg/mL and 4 mL of water. Following this, 0.3 mL of 5% NaNO<sub>2</sub> and 0.3 mL of 10% AlCl<sub>3</sub> were both added to the flask for 5 minutes. After 6 minutes, 2 mL of 1 M NaOH and the final 10 mL of water were added to the solution. After thoroughly combining the solutions, a UV-visible spectrophotometer was used to detect the absorbance at 510 nm in comparison to a blank control. The amount of flavonoids in the extract was expressed in rutin equivalents (RE), according to equation:  $(A_e \times m_0 \times 10) / (A_0 \times m_e)$ .

In the equation,  $A_e$  represents the average of the absorbance of the extract in triplicate,  $A_0$  represents the average of the absorbance of the standard rutin solution in triplicate,  $m_e$  represents the weight of the plant extract that was analyzed in g, and  $m_0$  represents the weight of the rutin in the solution in g. Flavonoid amount was expressed in mg/g plant extract in RE.

## *DPPH• Radical Scavenging Activity*

For DPPH, the percentage of DPPH• radical scavenging activity (%) was plotted against the extract concentration (μg/mL) to determine the IC<sub>50</sub>. In brief, a stock solution (1 mg/mL) of the extract was used in the range of 50–200 μg/mL, and an aliquot (5.0 μL) of the methanol solution containing different amounts of the extract was added to 195 μL of daily prepared DPPH• solution. Absorbance at 517 nm was measured on a UV-visible spectrophotometer (Multiskans skyhigh, Thermo Fisher Scientific, Milan, Italy) 10 min after starting the reaction.

All the experiments were performed in triplicate. Vitamin C provided as a positive control.

## List of Figures

Figure S1. ESI/LTQOrbitrap spectrum of compound 37  
Figure S2. MS/MS Spectrum of compound 37  
Figure S3.  $^1\text{H}$  NMR Spectrum of compound 37  
Figure S4. HSQC Spectrum of compound 37  
Figure S5. HMBC Spectrum of compound 37  
Figure S6.  $^{13}\text{C}$  NMR Spectrum of compound 37.  
Figure S7.  $^1\text{H}$  NMR Spectrum of compound 1  
Figure S8.  $^1\text{H}$  NMR Spectrum of compound 2  
Figure S9.  $^1\text{H}$  NMR Spectrum of compound 3  
Figure S10.  $^1\text{H}$  NMR Spectrum of compound 4  
Figure S11.  $^1\text{H}$  NMR Spectrum of compound 5  
Figure S12.  $^1\text{H}$  NMR Spectrum of compound 6  
Figure S13.  $^1\text{H}$  NMR Spectrum of compound 7  
Figure S14.  $^1\text{H}$  NMR Spectrum of compound 8  
Figure S15.  $^1\text{H}$  NMR Spectrum of compound 9  
Figure S16.  $^1\text{H}$  NMR Spectrum of compound 10  
Figure S17.  $^1\text{H}$  NMR Spectrum of compound 12  
Figure S18.  $^1\text{H}$  NMR Spectrum of compound 13  
Figure S19.  $^1\text{H}$  NMR Spectrum of compound 15  
Figure S20.  $^1\text{H}$  NMR Spectrum of compound 19  
Figure S21.  $^1\text{H}$  NMR Spectrum of compound 21  
Figure S22.  $^1\text{H}$  NMR Spectrum of compound 22  
Figure S23.  $^1\text{H}$  NMR Spectrum of compound 23  
Figure S24.  $^1\text{H}$  NMR Spectrum of compound 24  
Figure S25.  $^1\text{H}$  NMR Spectrum of compound 26  
Figure S26.  $^1\text{H}$  NMR Spectrum of compound 27  
Figure S27.  $^1\text{H}$  NMR Spectrum of compound 28  
Figure S28.  $^1\text{H}$  NMR Spectrum of compound 29  
Figure S29.  $^1\text{H}$  NMR Spectrum of compound 30  
Figure S30.  $^1\text{H}$  NMR Spectrum of compound 32  
Figure S31.  $^1\text{H}$  NMR Spectrum of compound 33  
Figure S32.  $^1\text{H}$  NMR Spectrum of compound 34  
Figure S33.  $^1\text{H}$  NMR Spectrum of compound 35  
Figure S34.  $^1\text{H}$  NMR Spectrum of compound 36  
Figure S35.  $^1\text{H}$  NMR Spectrum of compound 38  
Figure S36.  $^1\text{H}$  NMR Spectrum of compound 39

SBL4-14 #170-188 RT: 1.58-1.62 AV: 7 NL: 5.46E7  
T: FTMS - p ESI Full ms [190.00-1000.00]

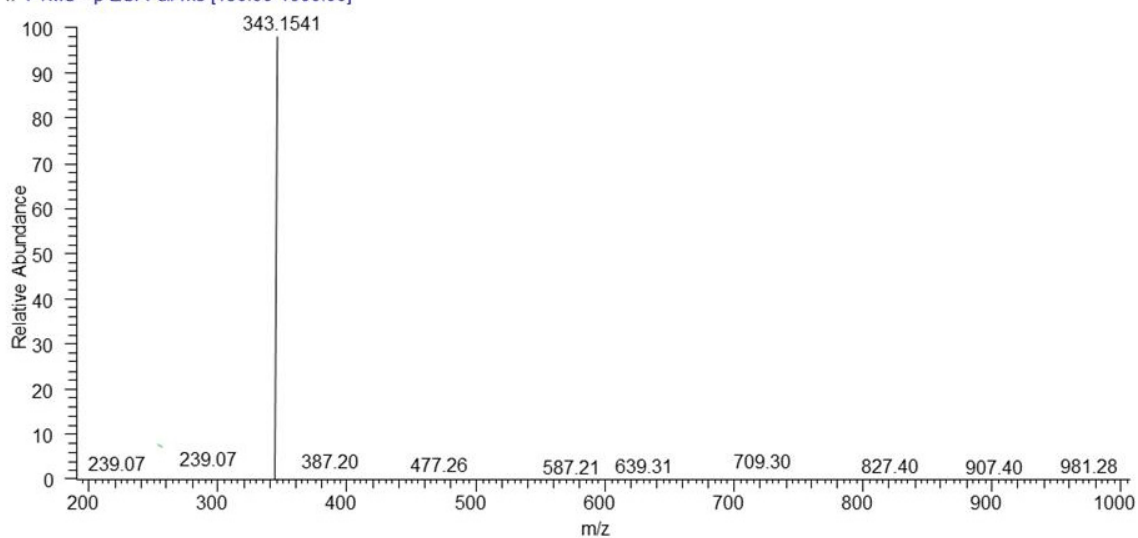

**Figure S1.** ESI/LTQOrbitrap spectrum of compound **37**, in negative ion mode.

SBL4-14 #106 RT: 0.93 AV: 1 SM: 7G NL: 1.42E7  
F: FTMS - p ESI Full ms2 343.10@cid30.00 [90.00-1000.00]

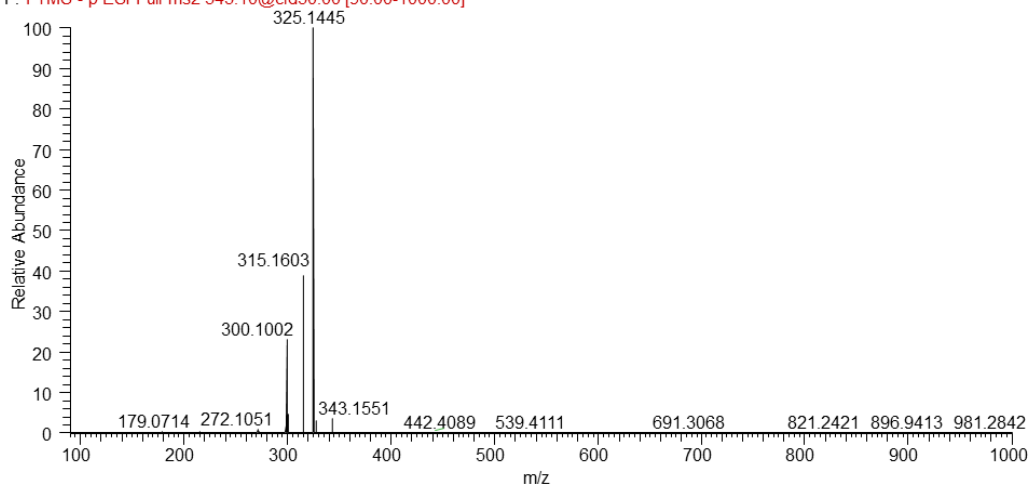

**Figure S2.** MS/MS spectrum of compound **37**

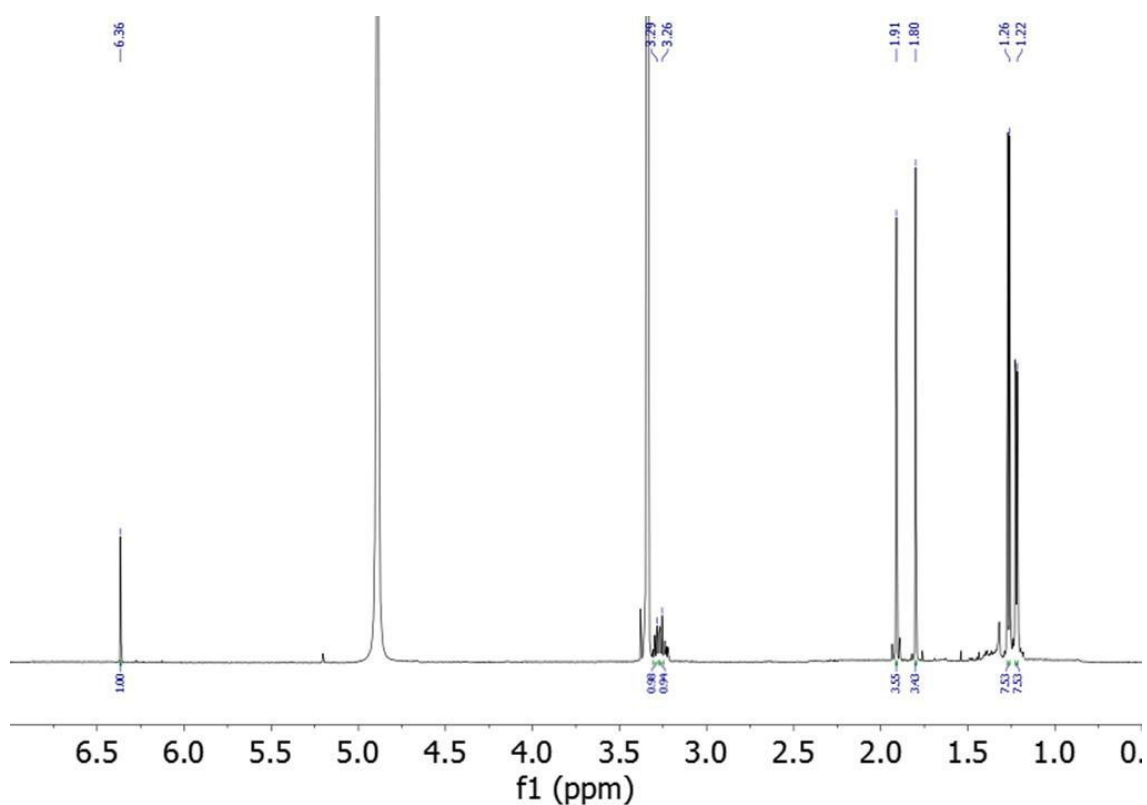

**Figure S3.** <sup>1</sup>H NMR Spectrum (600 MHz, CD<sub>3</sub>OD) of compound **37**.

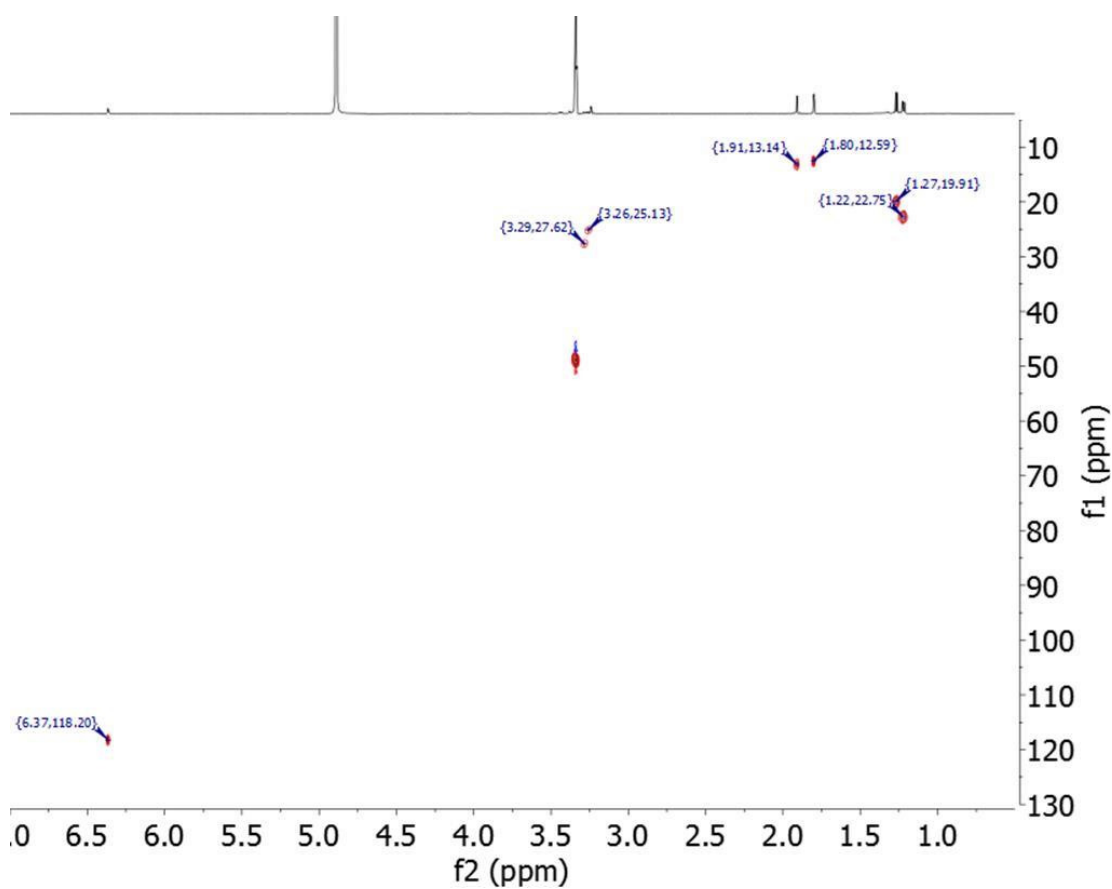

**Figure S4.** HSQC Spectrum (CD<sub>3</sub>OD) of compound **37**.

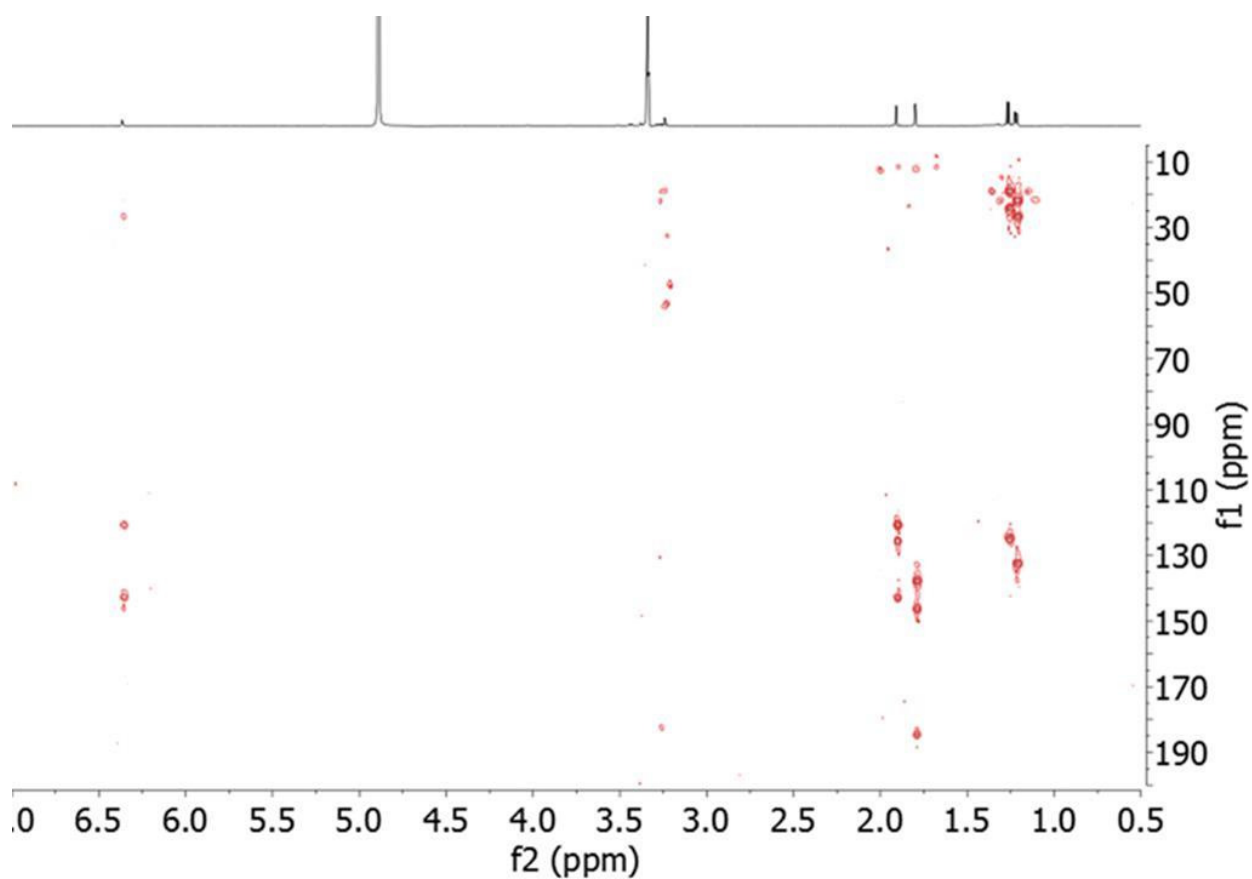

**Figure S5.** HMBC Spectrum (CD<sub>3</sub>OD) of compound **37**.

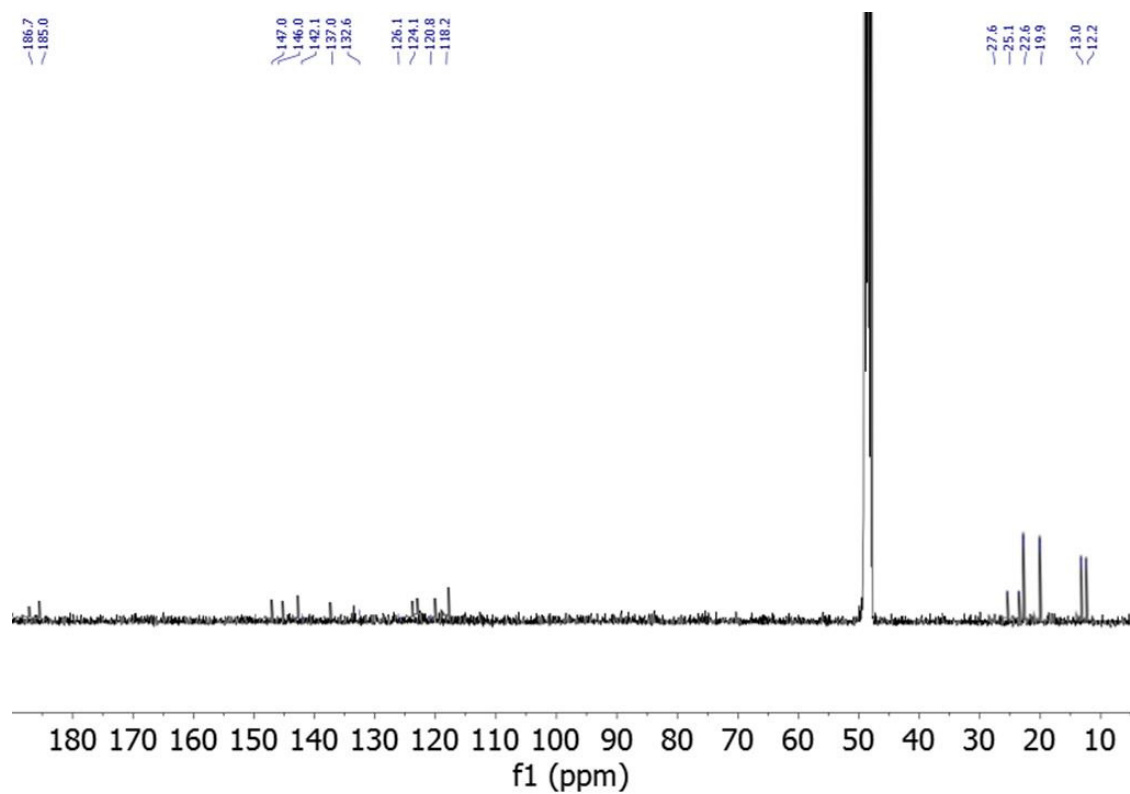

**Figure S6.** <sup>13</sup>C NMR Spectrum (150 MHz, CD<sub>3</sub>OD) of compound **37**.

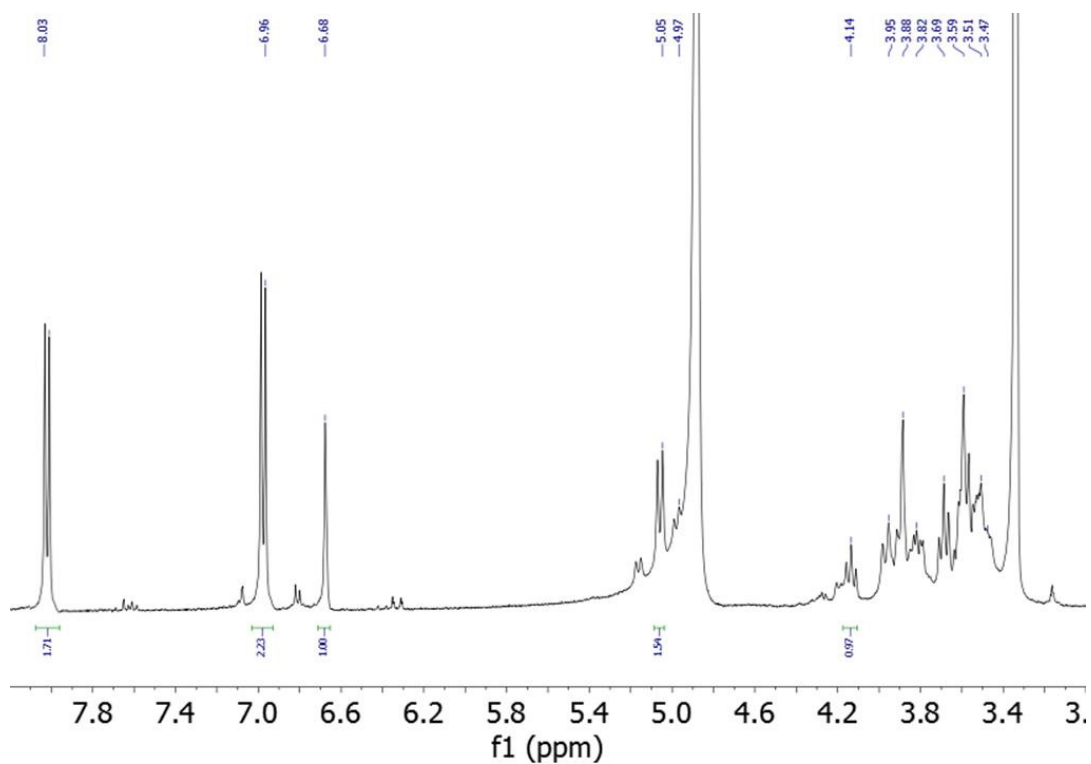

**Figure S7.** <sup>1</sup>H NMR Spectrum (600 MHz, CD<sub>3</sub>OD) of compound **1**.

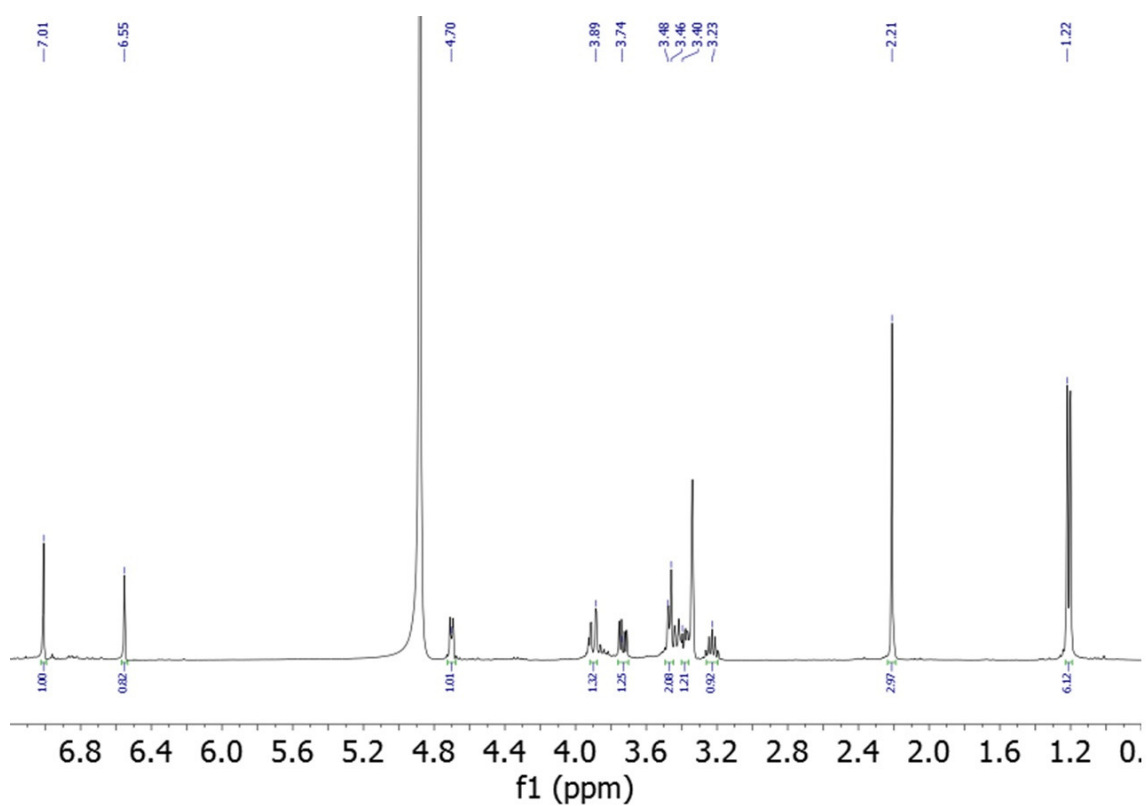

**Figure S8.** <sup>1</sup>H NMR Spectrum (600 MHz, CD<sub>3</sub>OD) of compound **2**.

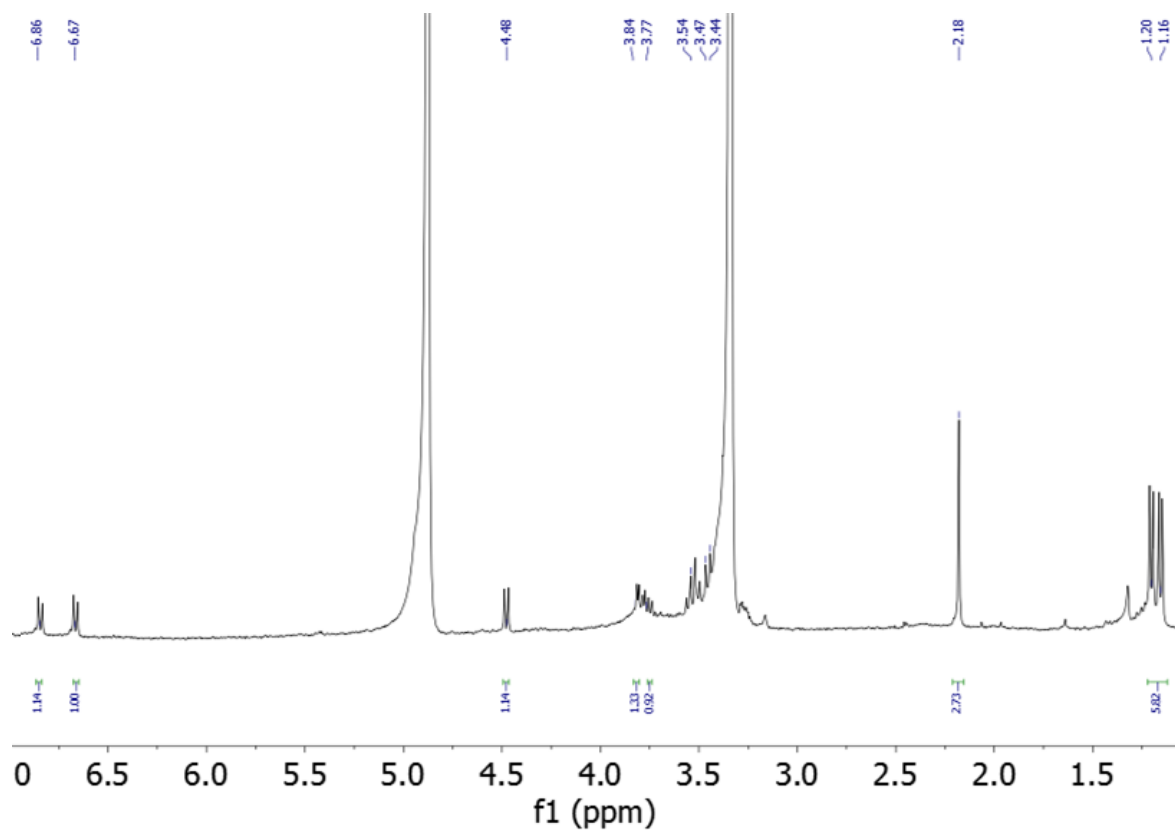

**Figure S9.**  $^1\text{H}$  NMR Spectrum (600 MHz,  $\text{CD}_3\text{OD}$ ) of compound **3**.

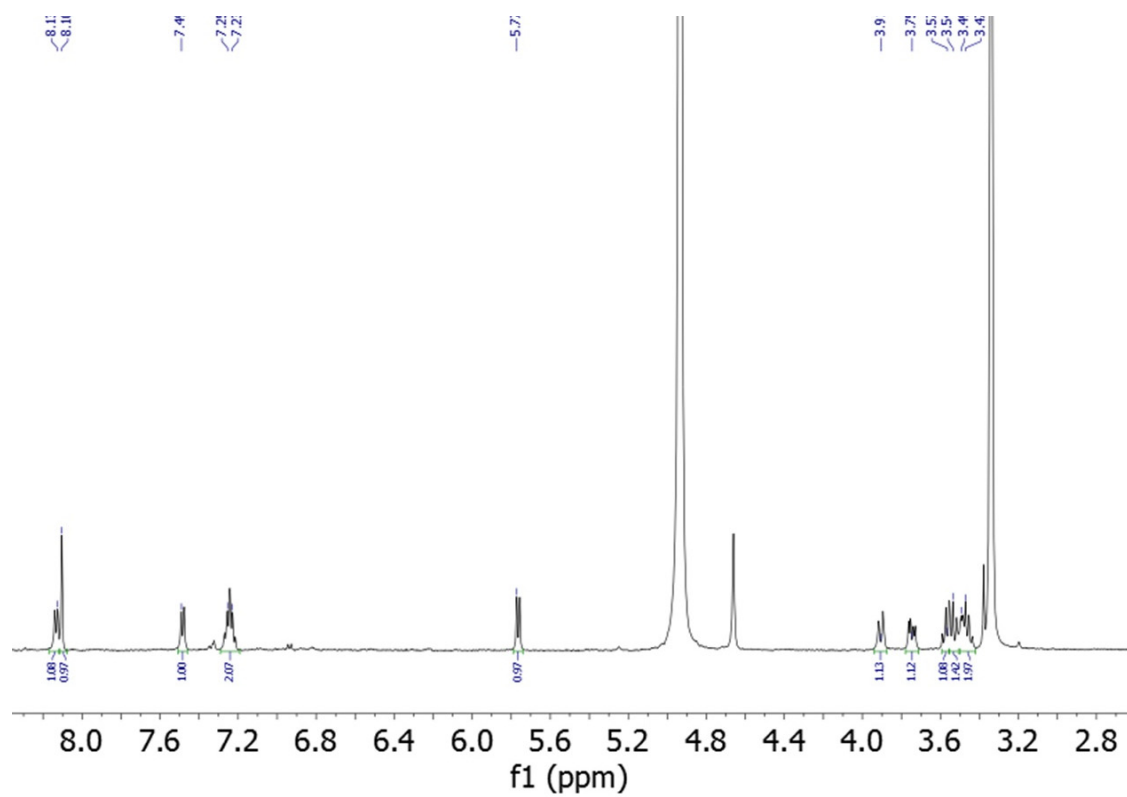

**Figure S10.**  $^1\text{H}$  NMR Spectrum (600 MHz,  $\text{CD}_3\text{OD}$ ) of compound **4**.

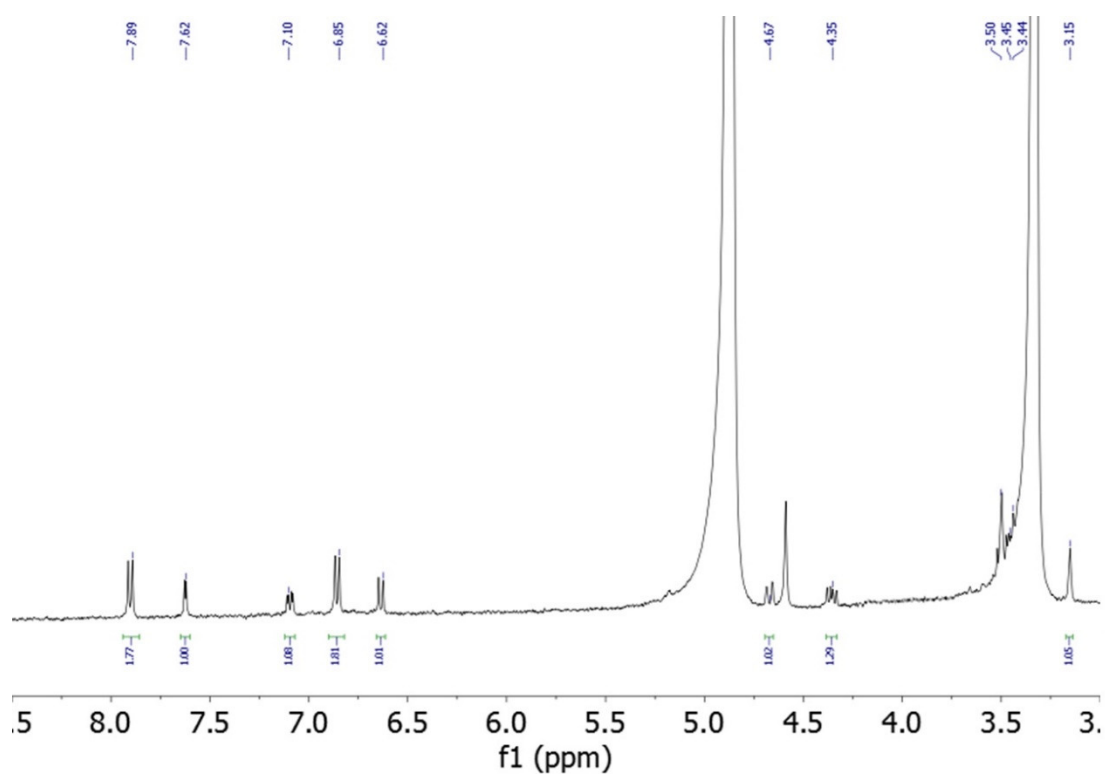

**Figure S11.** <sup>1</sup>H NMR Spectrum (600 MHz, CD<sub>3</sub>OD) of compound **5**.

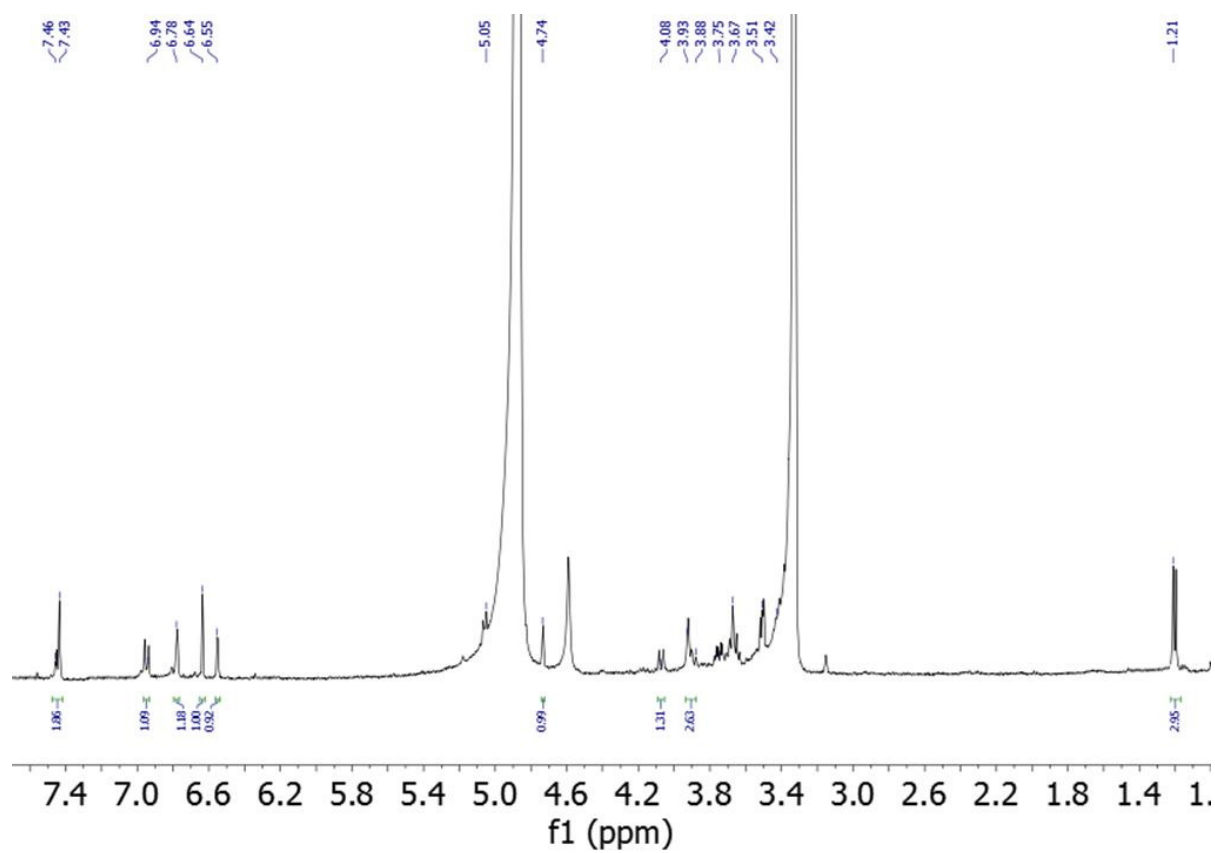

**Figure S12.** <sup>1</sup>H NMR Spectrum (600 MHz, CD<sub>3</sub>OD) of compound **6**.



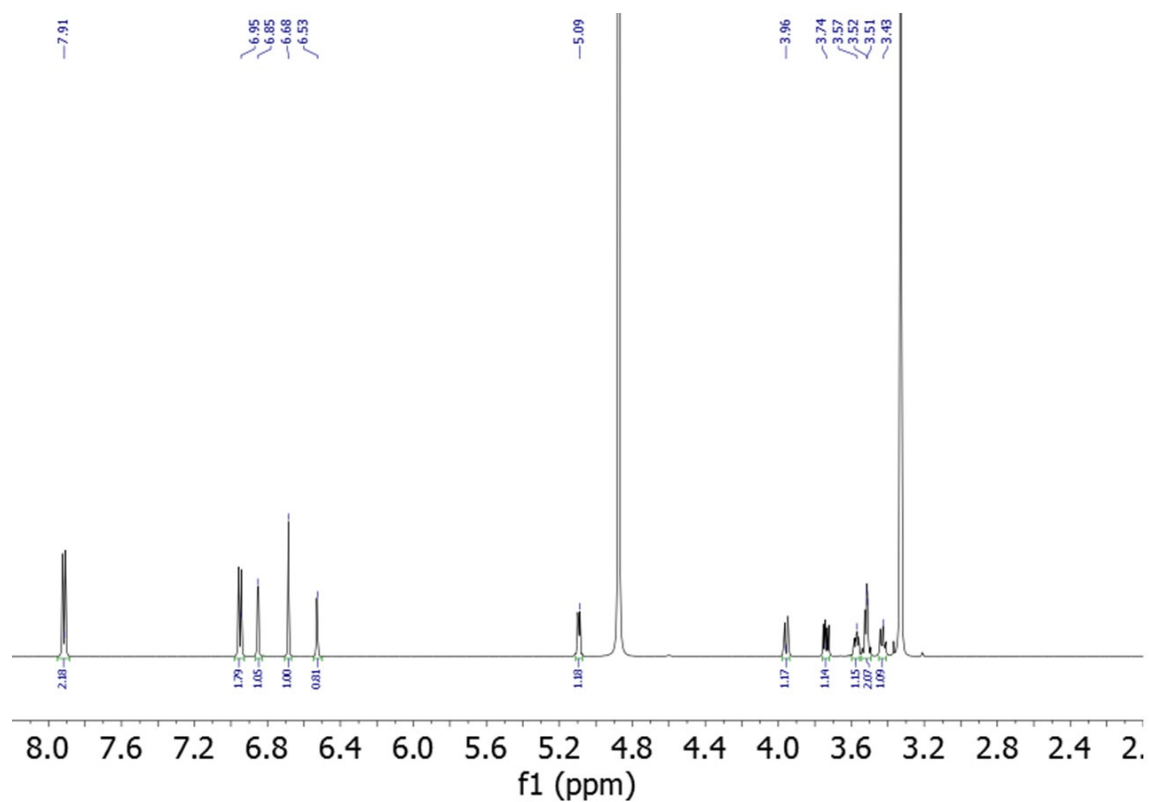

**Figure S13.** <sup>1</sup>H NMR Spectrum (600 MHz, CD<sub>3</sub>OD) of compound 7.

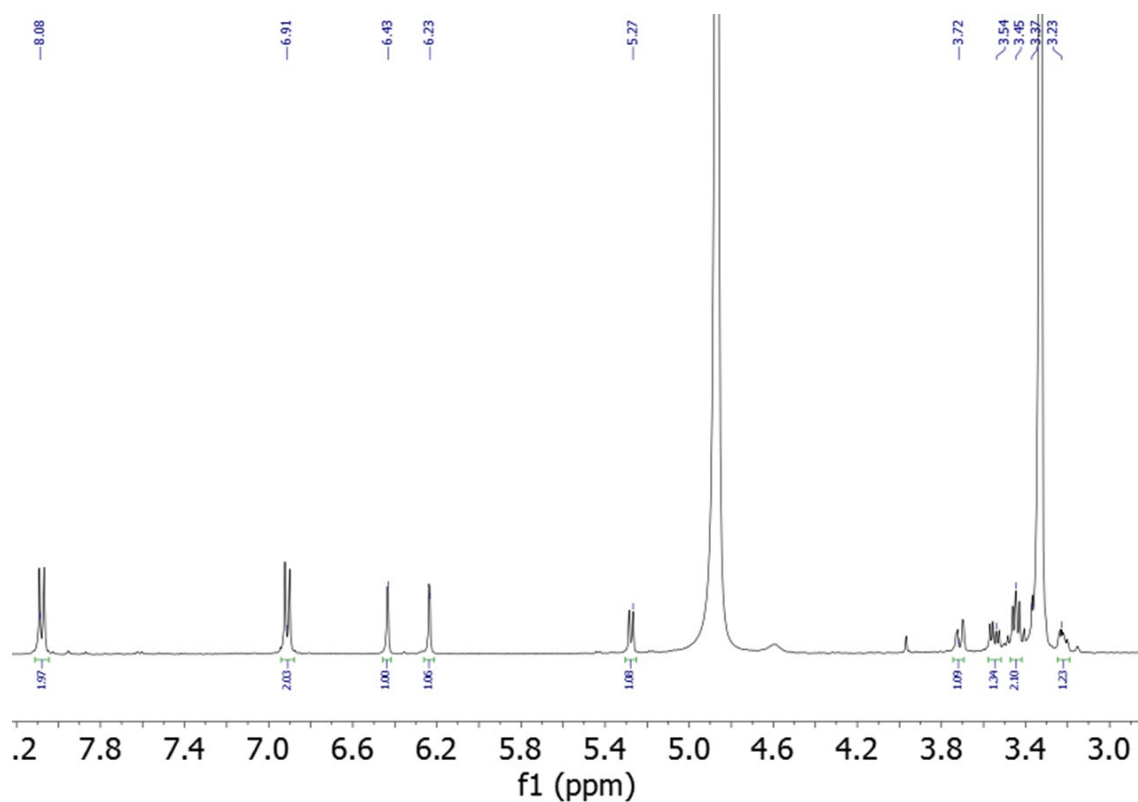

**Figure S14.** <sup>1</sup>H NMR Spectrum (600 MHz, CD<sub>3</sub>OD) of compound 8.

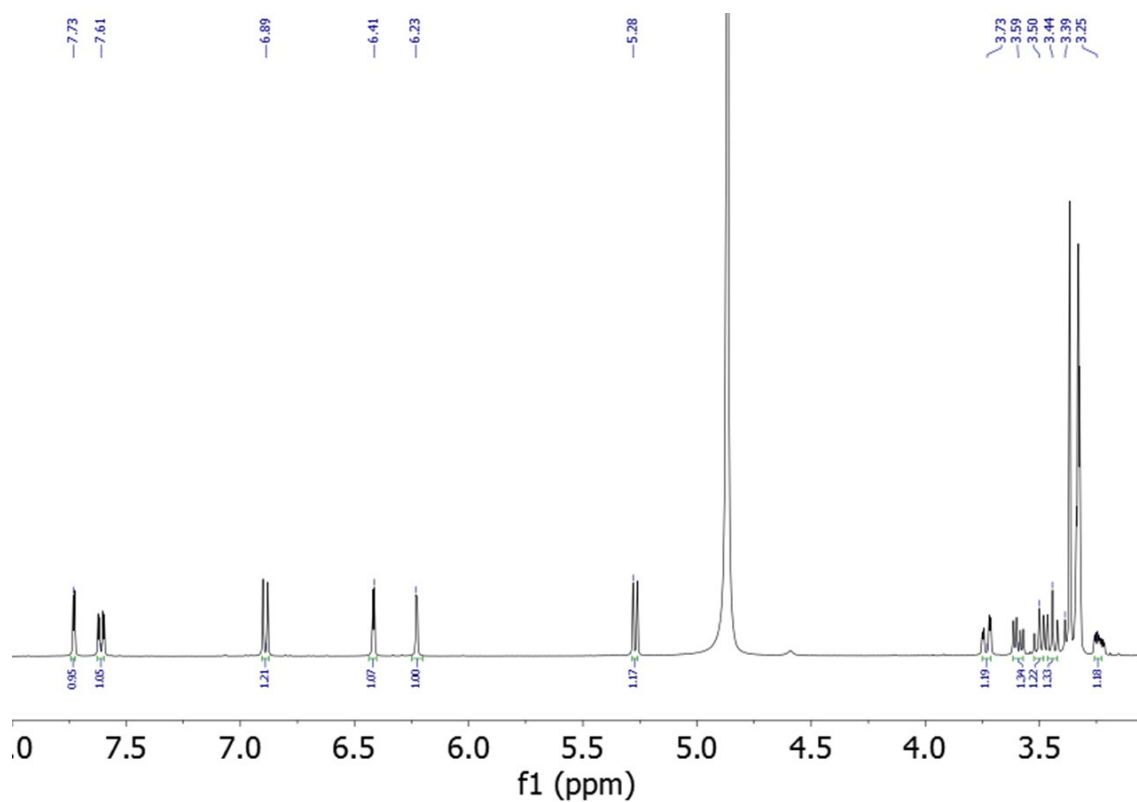

**Figure S15.** <sup>1</sup>H NMR Spectrum (600 MHz, CD<sub>3</sub>OD) of compound **9**.

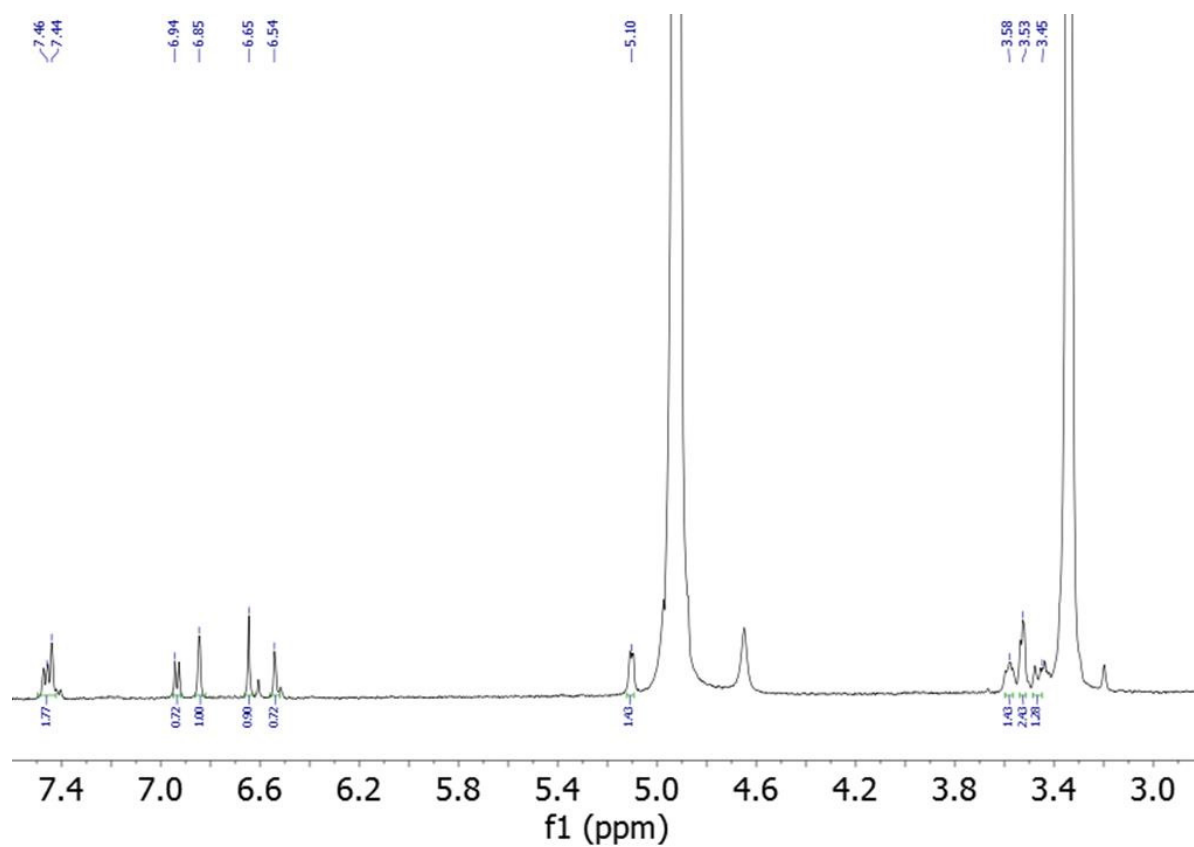

**Figure S16.** <sup>1</sup>H NMR Spectrum (600 MHz, CD<sub>3</sub>OD) of compound **10**.

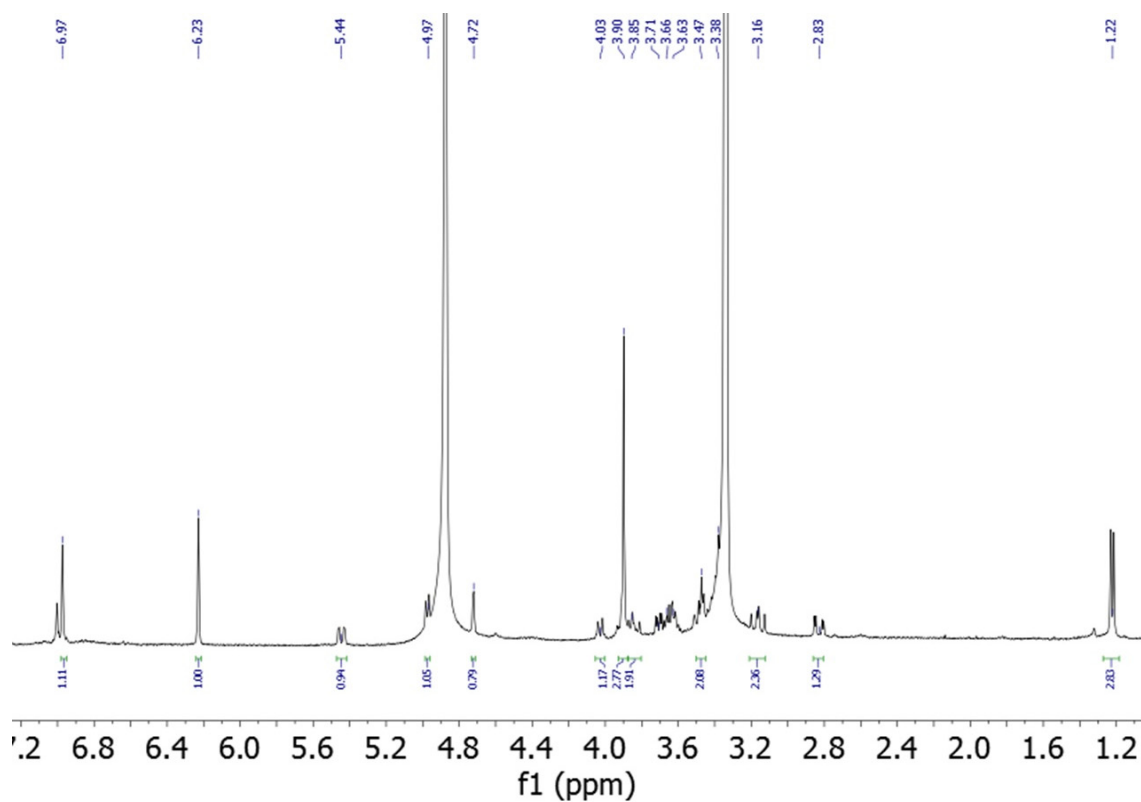

**Figure S17.** <sup>1</sup>H NMR Spectrum (600 MHz, CD<sub>3</sub>OD) of compound 12.

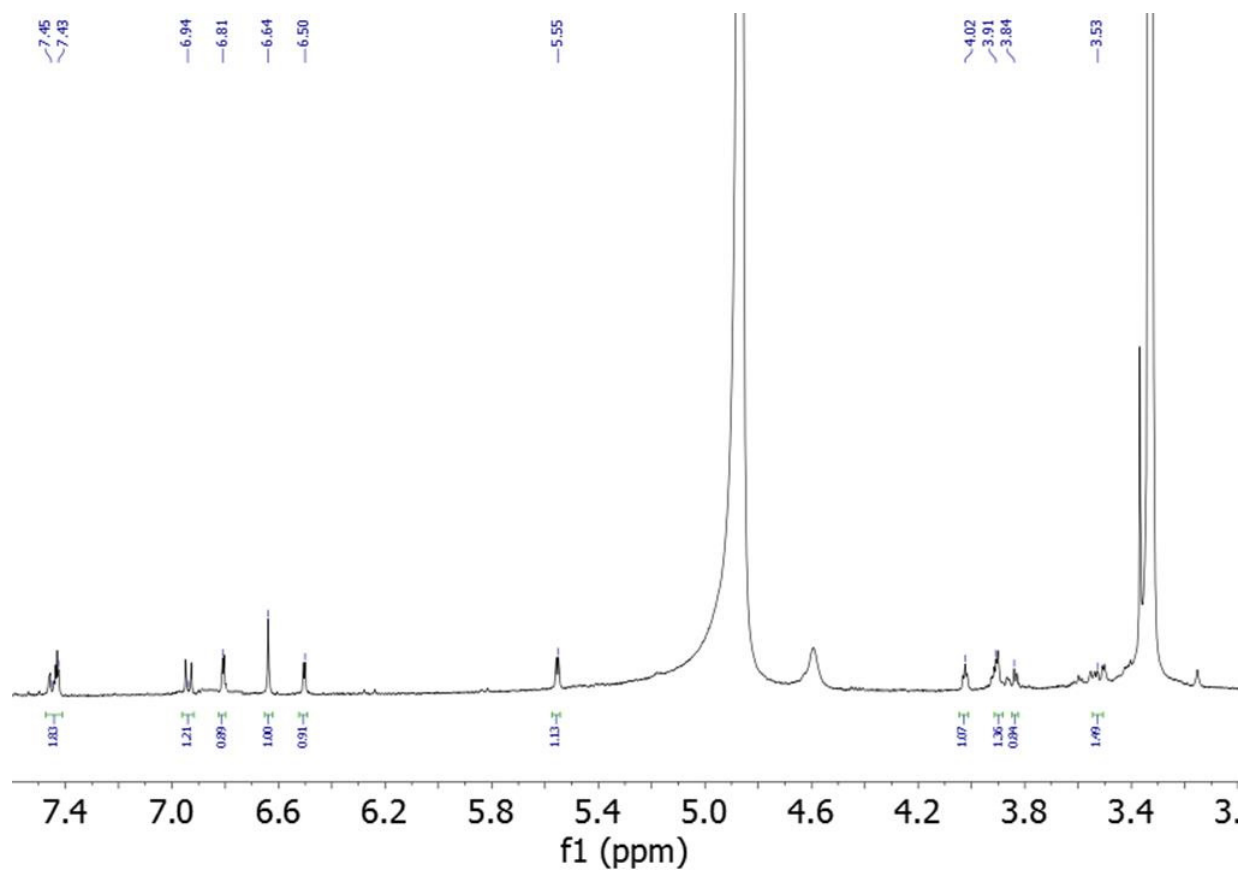

**Figure S18.** <sup>1</sup>H NMR Spectrum (600 MHz, CD<sub>3</sub>OD) of compound 13.

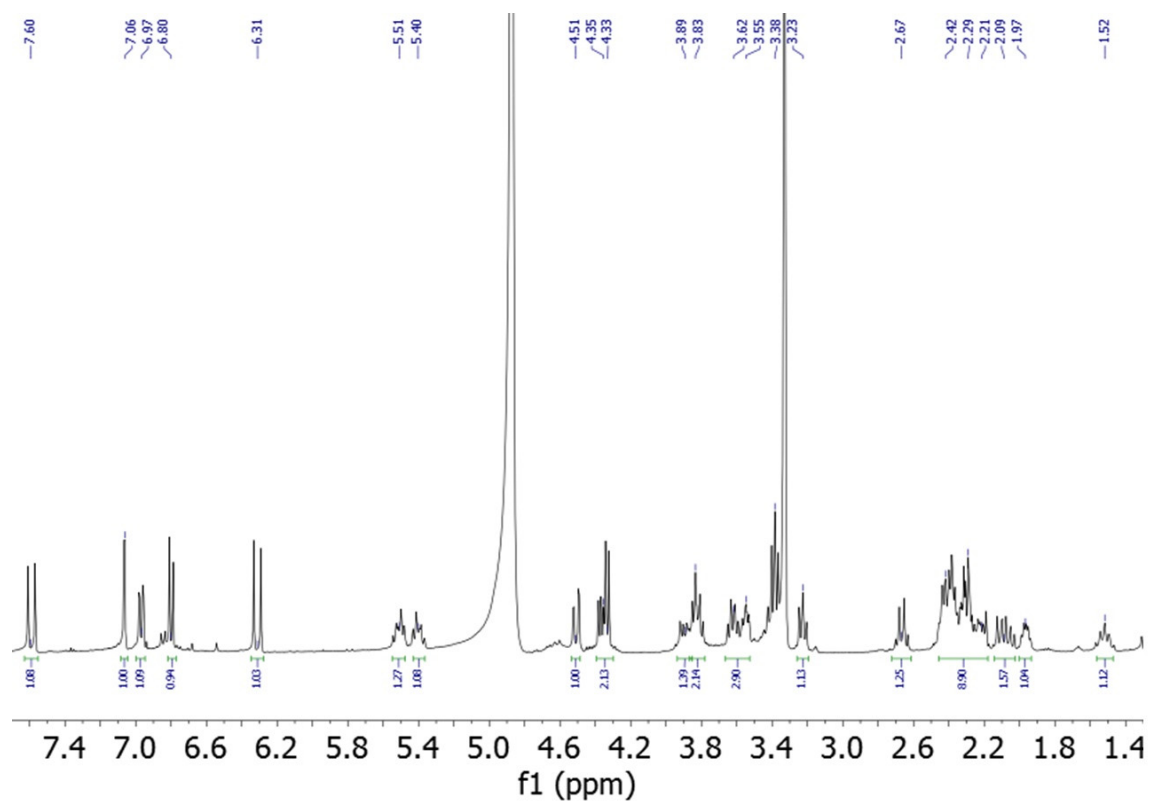

**Figure S19.** <sup>1</sup>H NMR Spectrum (600 MHz, CD<sub>3</sub>OD) of compound **15**.

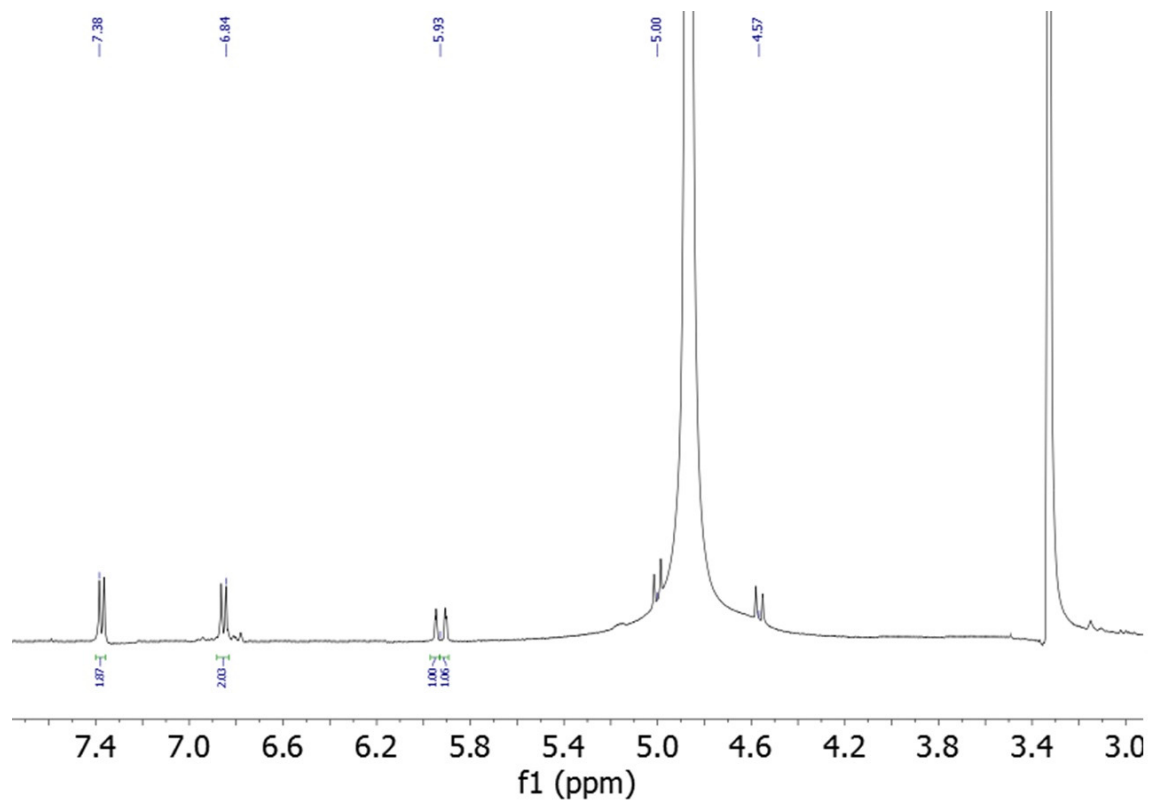

**Figure S20.** <sup>1</sup>H NMR Spectrum (600 MHz, CD<sub>3</sub>OD) of compound **19**.

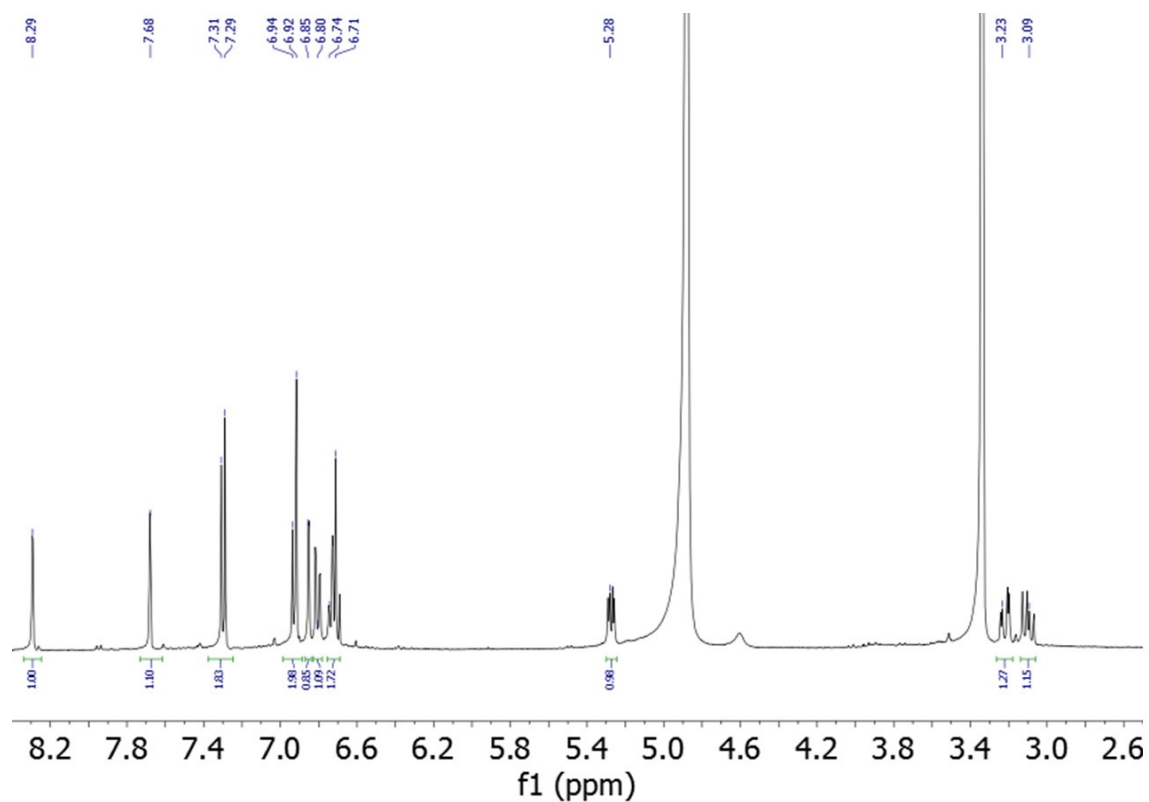

**Figure S21.** <sup>1</sup>H NMR Spectrum (600 MHz, CD<sub>3</sub>OD) of compound **21**.

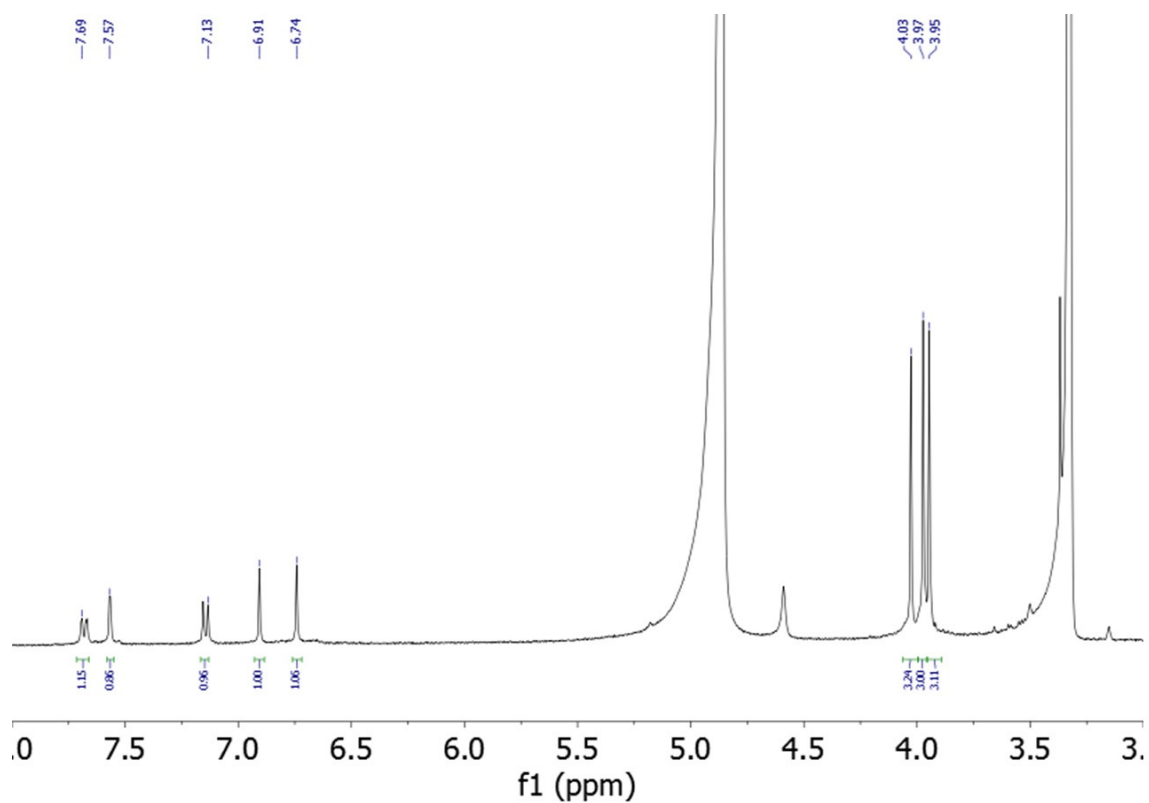

**Figure S22.** <sup>1</sup>H NMR Spectrum (600 MHz, CD<sub>3</sub>OD) of compound **22**.

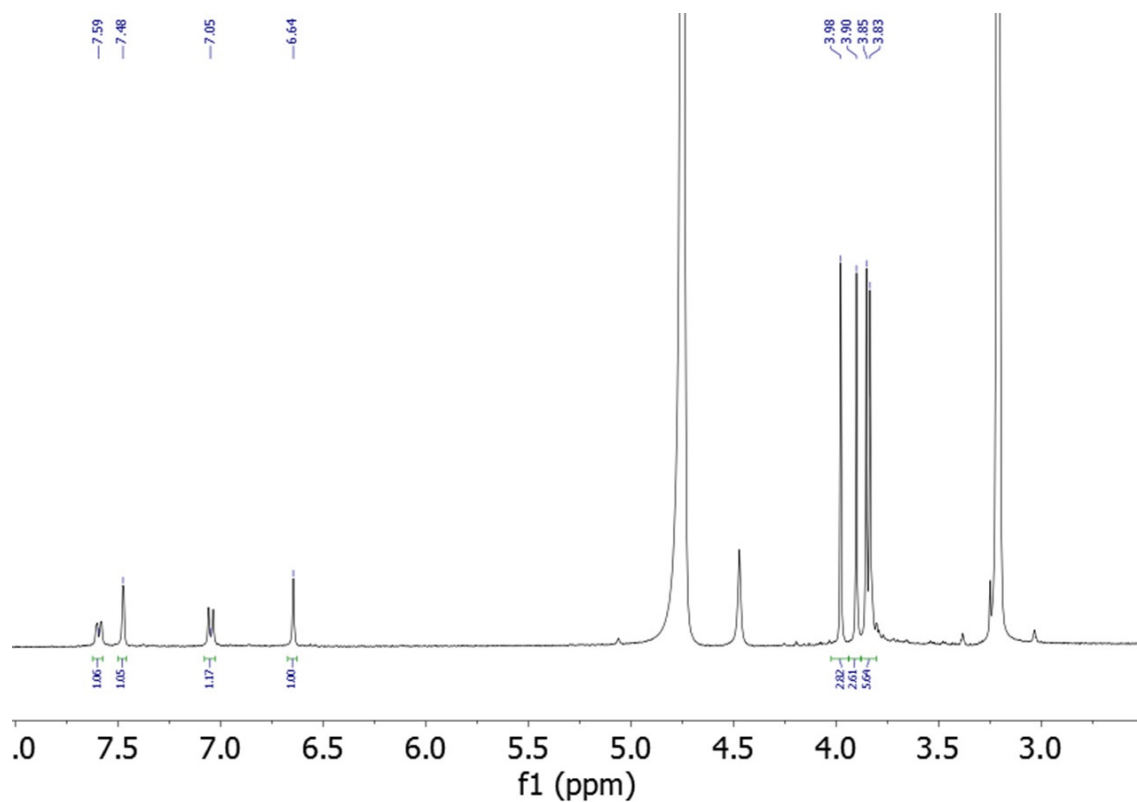

**Figure S23.** <sup>1</sup>H NMR Spectrum (600 MHz, CD<sub>3</sub>OD) of compound **23**.

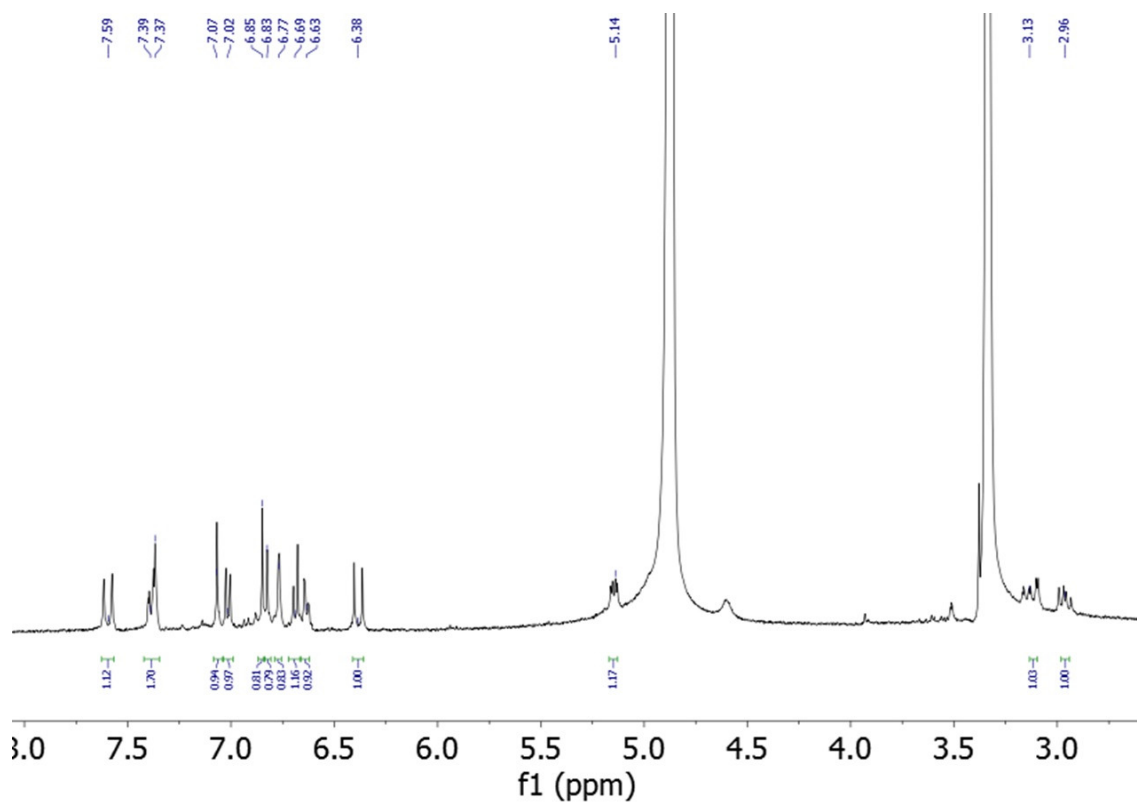

**Figure S24.** <sup>1</sup>H NMR Spectrum (600 MHz, CD<sub>3</sub>OD) of compound **24**.

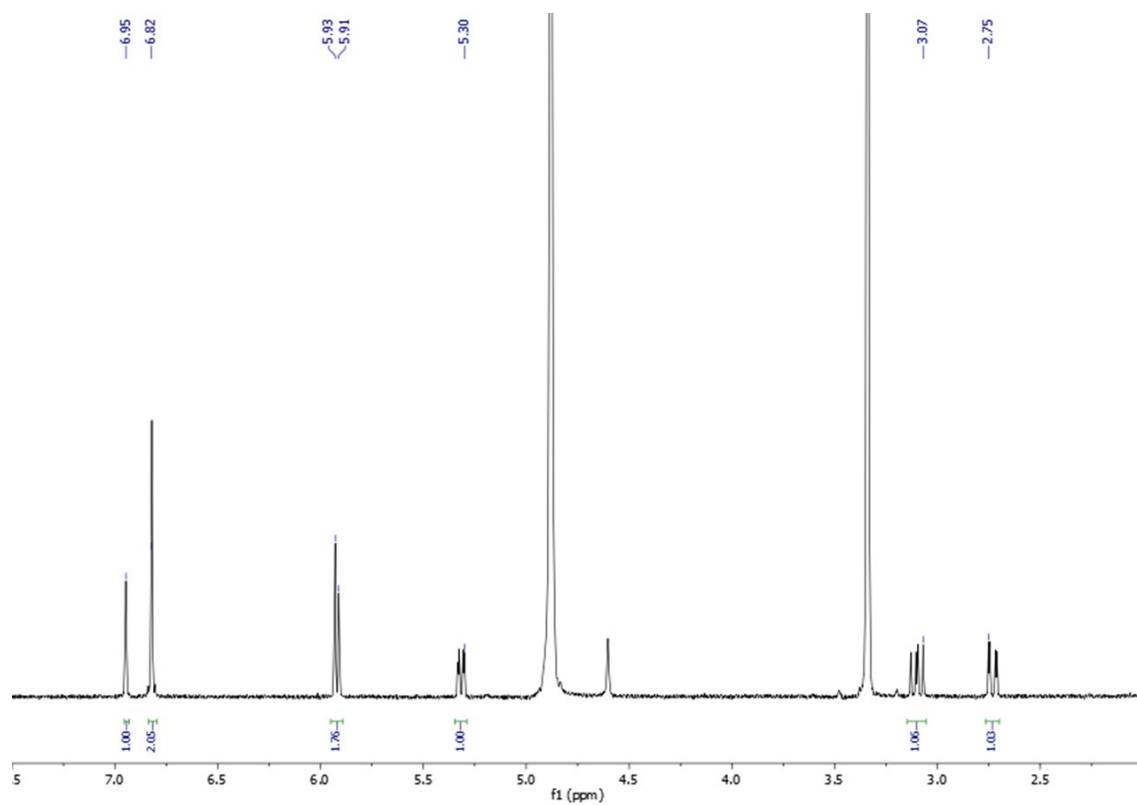

**Figure S25.** <sup>1</sup>H NMR Spectrum (600 MHz, CD<sub>3</sub>OD) of compound **26**.

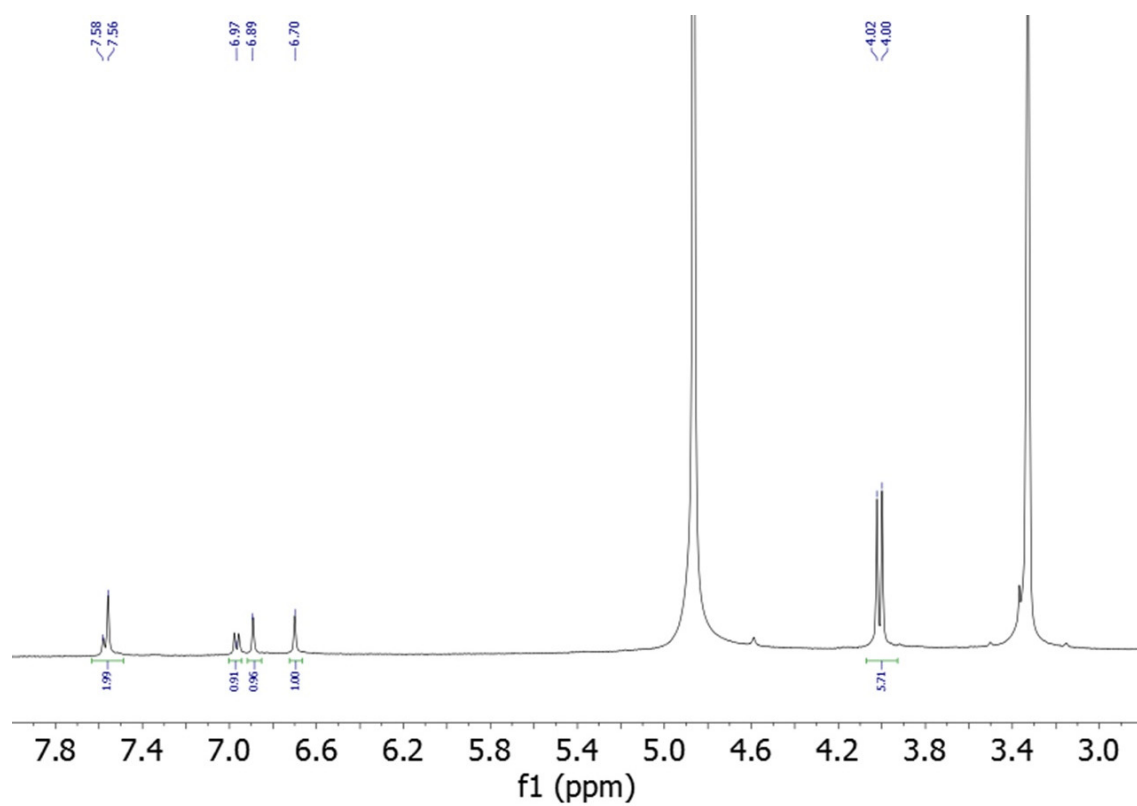

**Figure S26.** <sup>1</sup>H NMR Spectrum (600 MHz, CD<sub>3</sub>OD) of compound **27**.

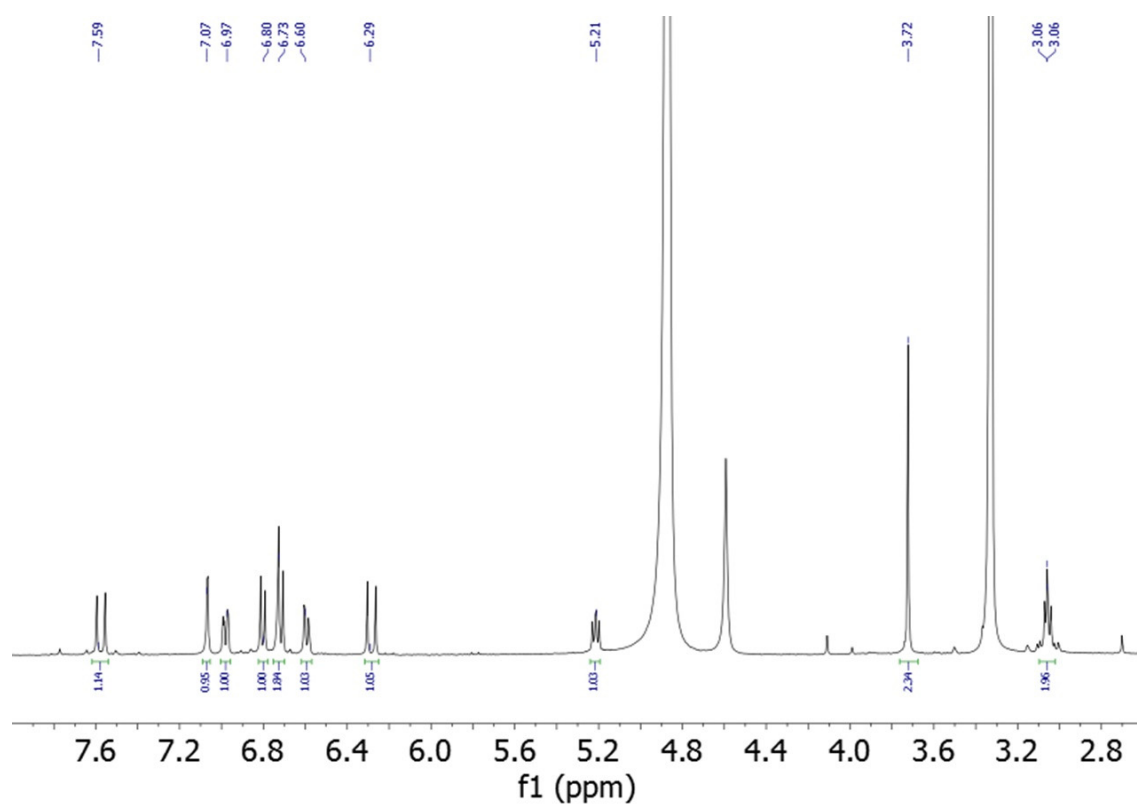

**Figure S27.** <sup>1</sup>H NMR Spectrum (600 MHz, CD<sub>3</sub>OD) of compound **28**.

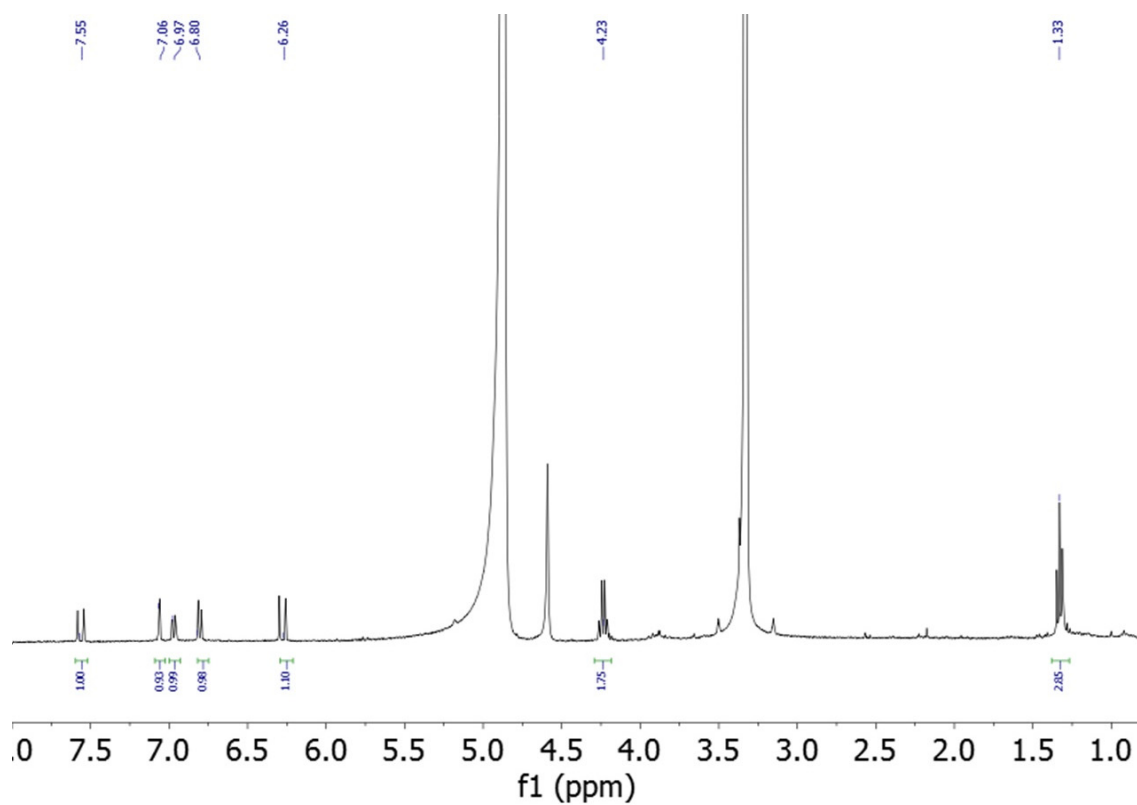

**Figure S28.** <sup>1</sup>H NMR Spectrum (600 MHz, CD<sub>3</sub>OD) of compound **29**.



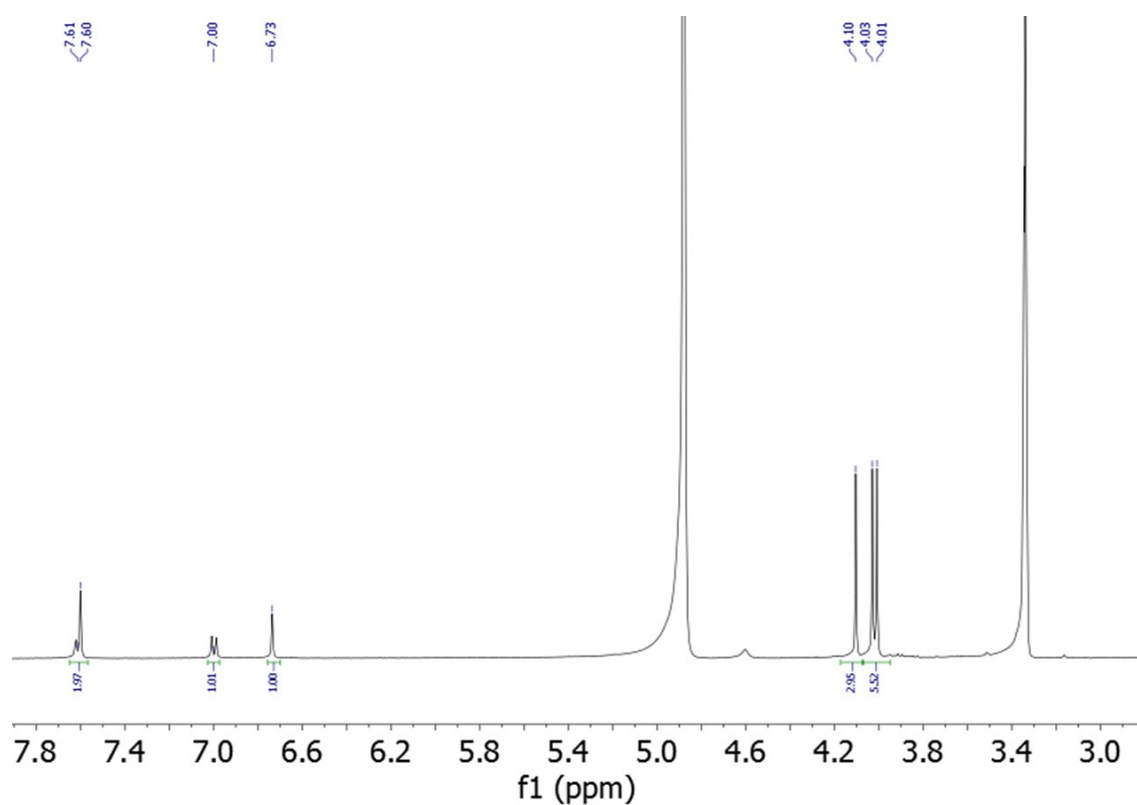

**Figure S29.** <sup>1</sup>H NMR Spectrum (600 MHz, CD<sub>3</sub>OD) of compound **30**.

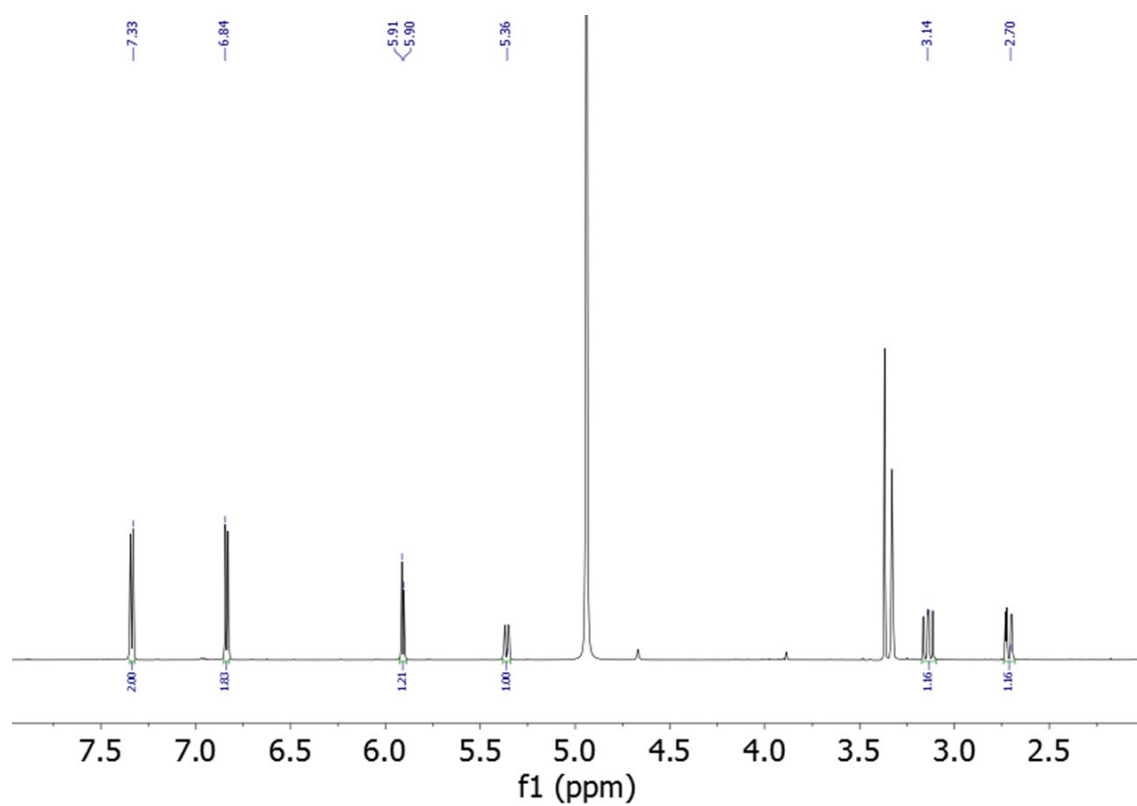

**Figure S30.** <sup>1</sup>H NMR Spectrum (600 MHz, CD<sub>3</sub>OD) of compound **32**.

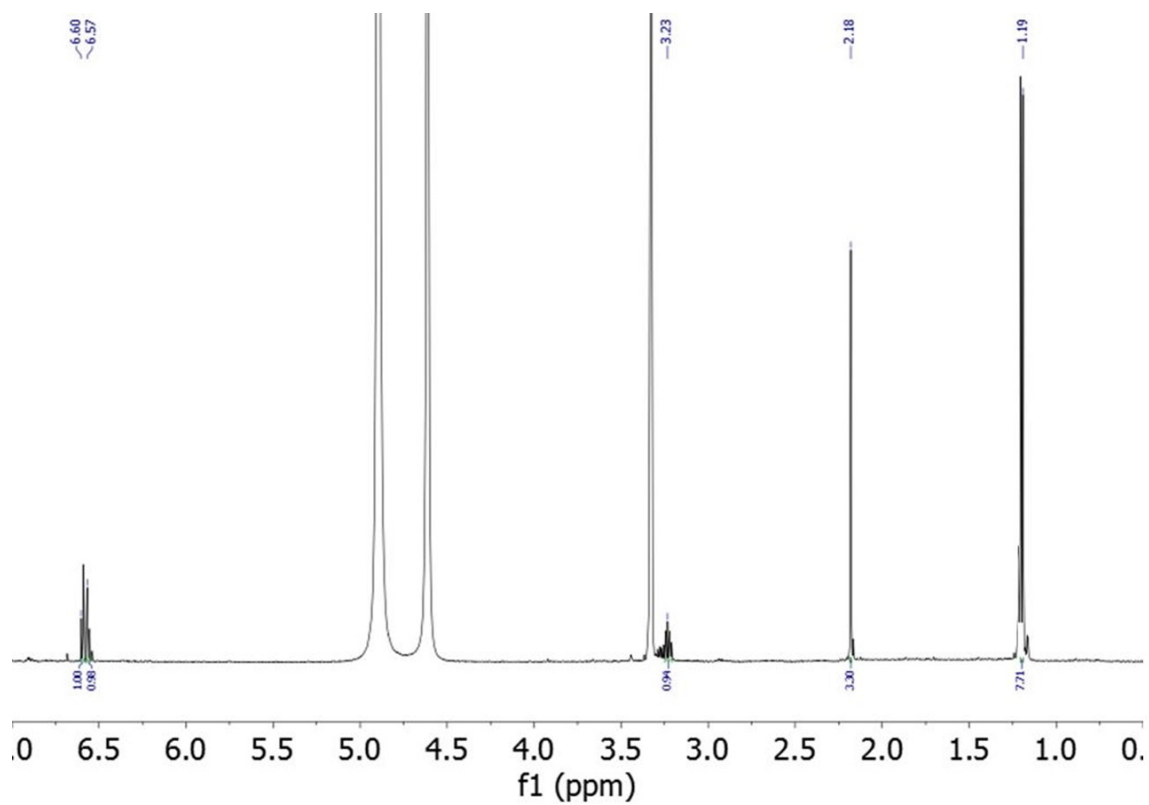

**Figure S31.** <sup>1</sup>H NMR Spectrum (600 MHz, CD<sub>3</sub>OD) of compound **33**.

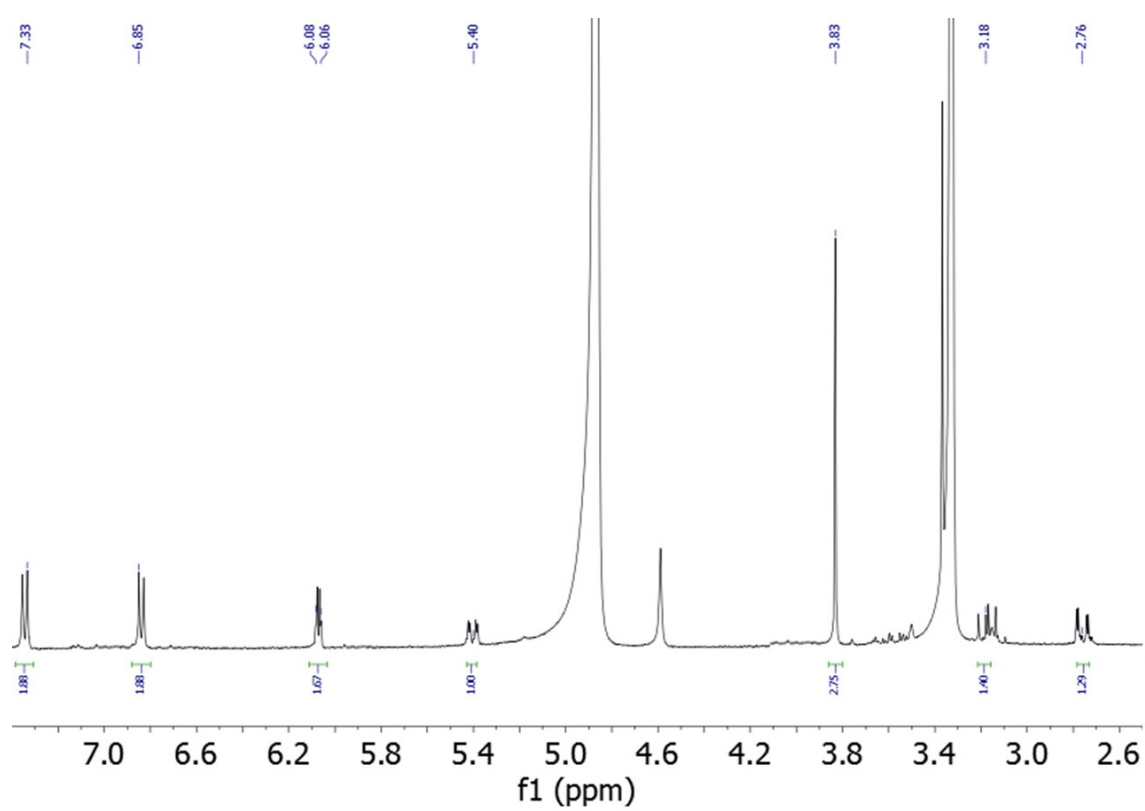

**Figure S32.** <sup>1</sup>H NMR Spectrum (600 MHz, CD<sub>3</sub>OD) of compound **34**.

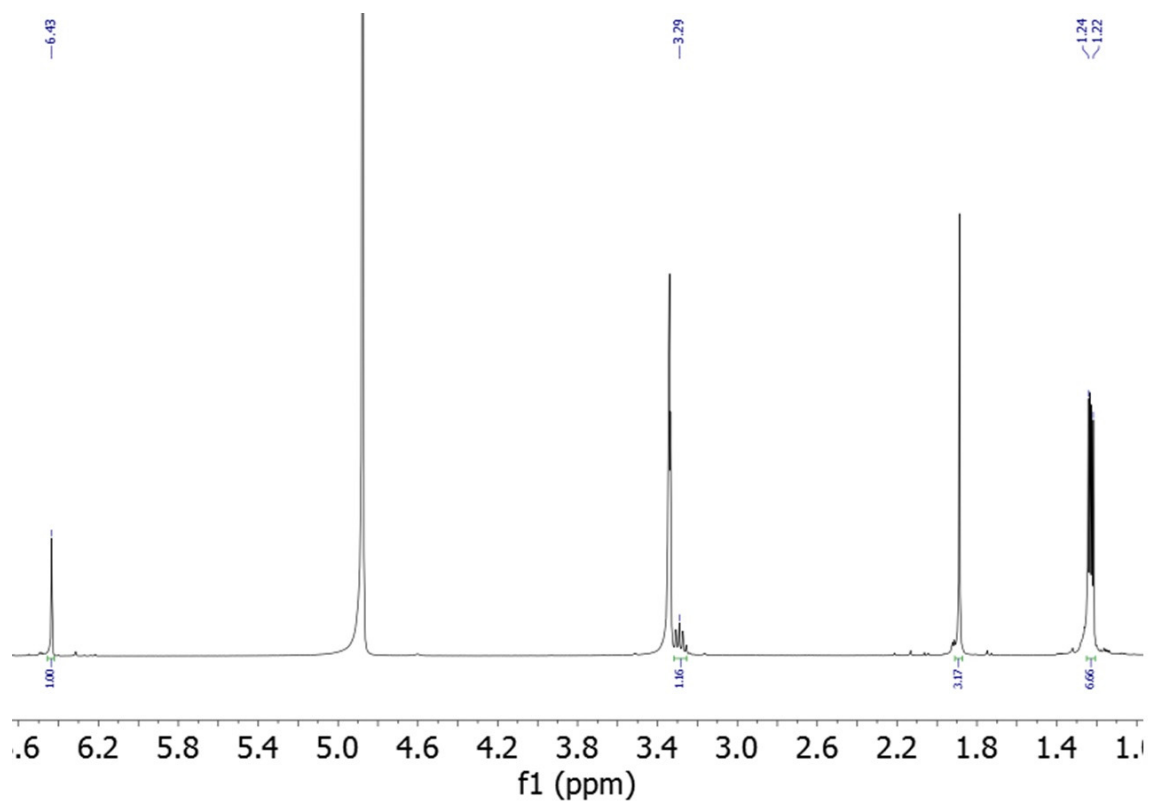

**Figure S33.** <sup>1</sup>H NMR Spectrum (600 MHz, CD<sub>3</sub>OD) of compound **35**.

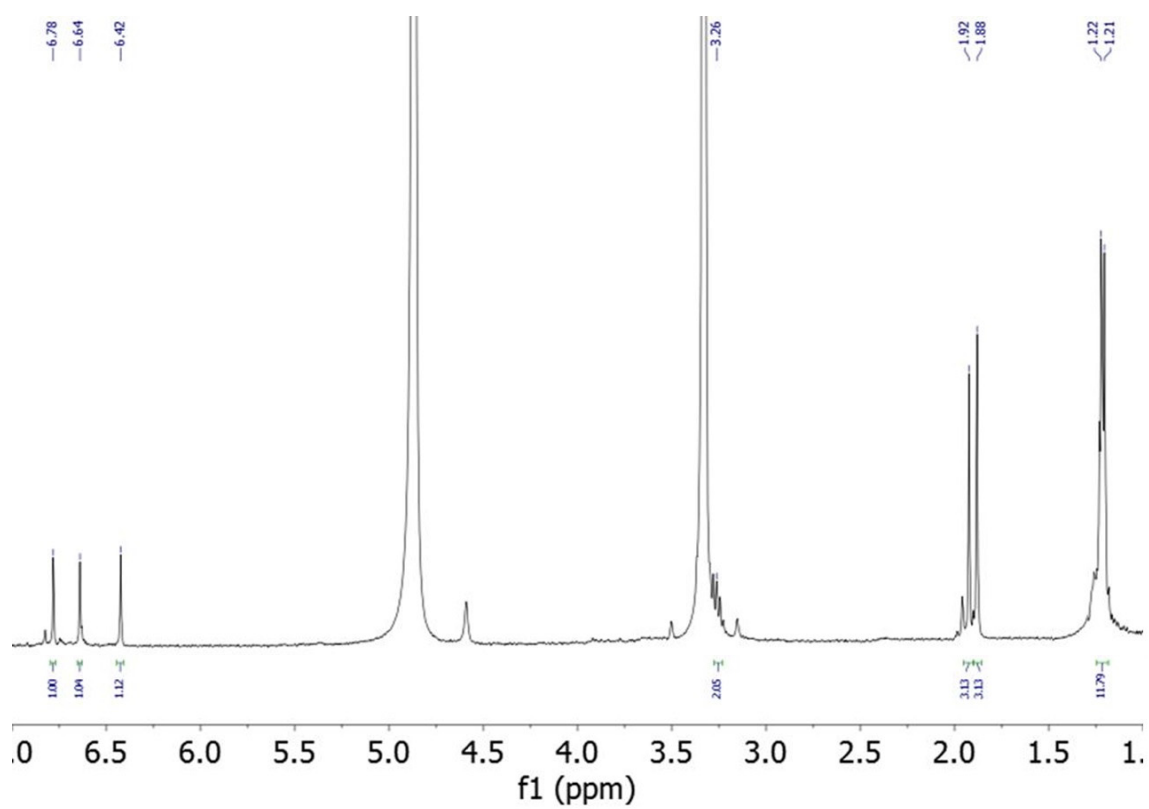

**Figure S34.** <sup>1</sup>H NMR Spectrum (600 MHz, CD<sub>3</sub>OD) of compound **36**.

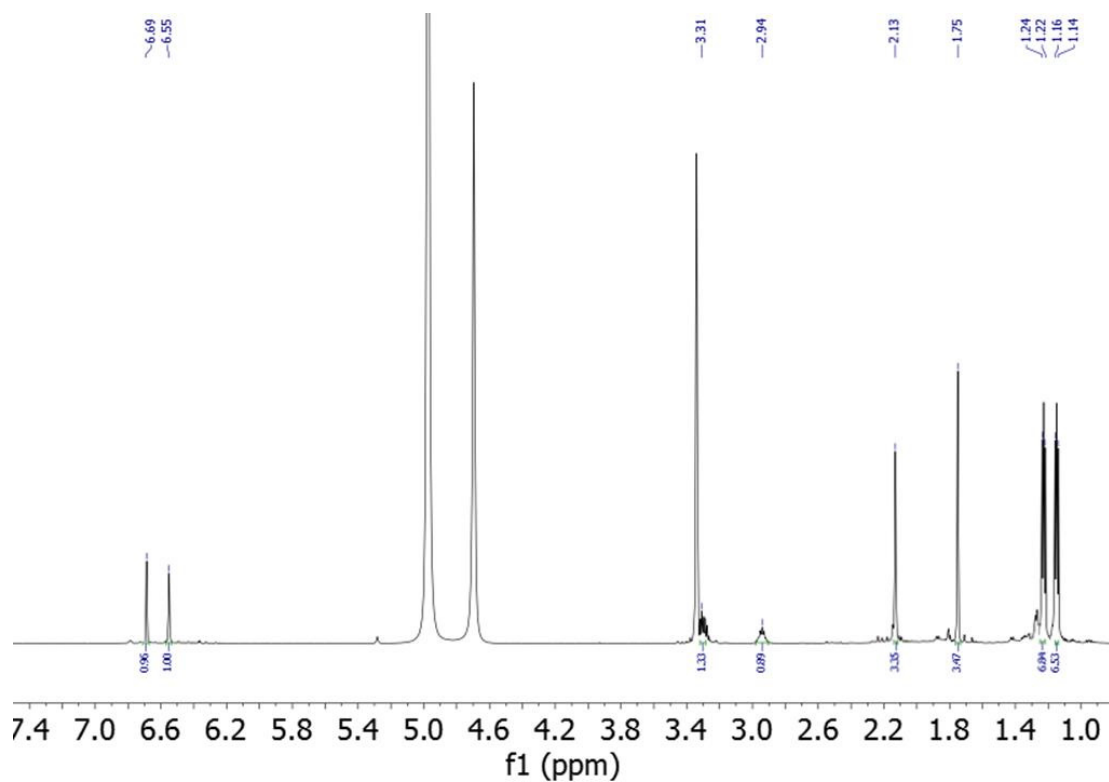

**Figure S35.** <sup>1</sup>H NMR Spectrum (600 MHz, CD<sub>3</sub>OD) of compound **38**.

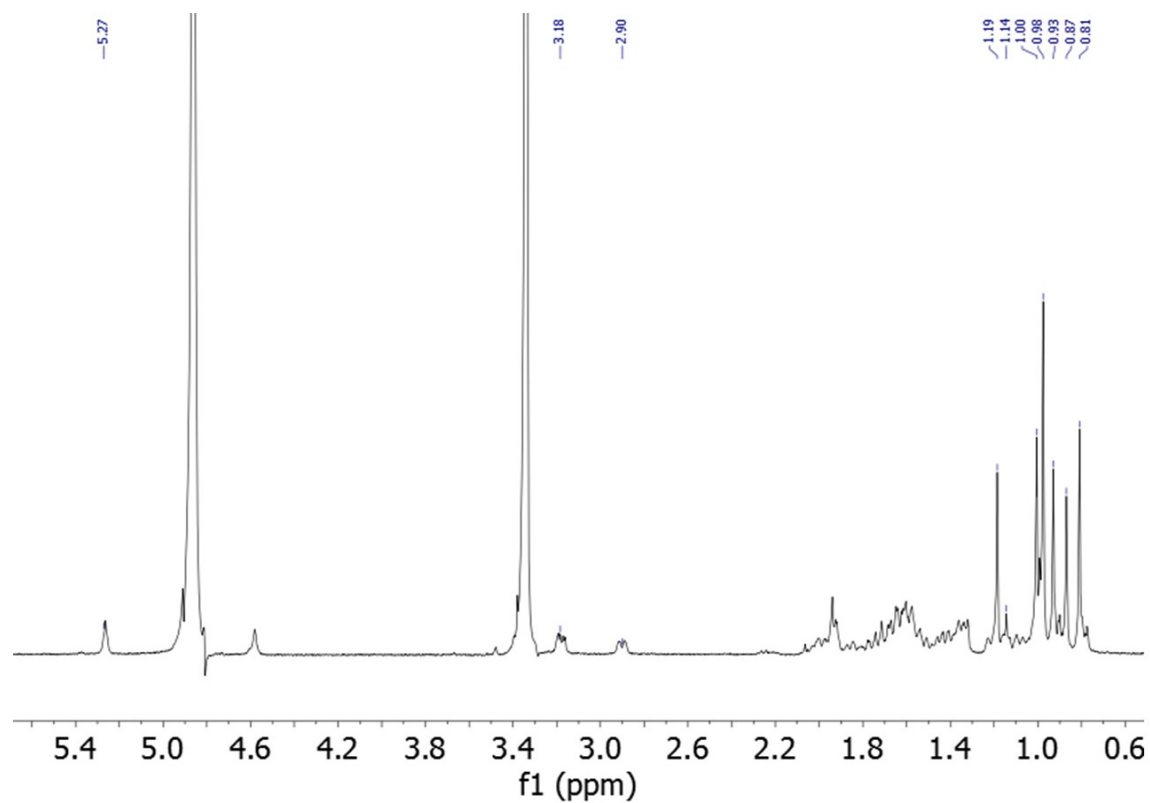

**Figure S36.** <sup>1</sup>H NMR Spectrum (600 MHz, CD<sub>3</sub>OD) of compound **39**.
